# Supplementary material for: Pipeline for specific subtype amplification and drug resistance detection in hepatitis C virus
Source: PubMed Central journal article supplement (PMC6122477; doi:10.1186/s12879-018-3356-6), 2018-09-03
Supplement: 12879_2018_3356_MOESM2_ESM.pdf [file 12879_2018_3356_MOESM2_ESM.pdf]

**Table S2.** Oligonucleotides used to perform the site-directed mutagenesis, qRT-PCR, control of basal amino acid sequencing error, and control of PCR recombination.

| Primer Name                  | Sense | Sequence (5'-3')                                                          | Position <sup>a</sup> |
|------------------------------|-------|---------------------------------------------------------------------------|-----------------------|
| Jc1-NS5A-F2                  | Fw    | ACTACCTTCTCCAGAGTTTTTC                                                    | 6697                  |
| Bch-0-3 <sup>b</sup>         | Rv    | AGCAGGTTGGCATCGACCATGTCCACGTCA<br>TAGGTATGGCTGTGGGTGGTGCAGGTGG            | 7047                  |
| Bch-0-4 <sup>c</sup>         | Fw    | TGCCAACCTGCTCATGGAGGGCGGTGTGGCT<br>CAGACA <u>AA</u> ACCTGAGTCCAGGGTGCCCGT | 7036                  |
| Bch-0-21 <sup>d</sup>        | Rv    | AGGCGTCGGA <u>AC</u> CTTCTTGG                                             | 7315                  |
| Bch-0-6 <sup>d</sup>         | Fw    | AGAAGGTTCCGACGCCTCCCCCAAGGAGAC                                            | 7299                  |
| Jc1-NS5B-R1                  | Rv    | TCTCGCAGACCCGGACGCCGAG                                                    | 8180                  |
| HCV-5UTR-F2                  | Fw    | TGAGGAACTACTGTCTTCACGCAGAAAG                                              | 47                    |
| HCV-5UTR-R2                  | Rv    | TGCTCATGGTGCACGGTCTACGAG                                                  | 347                   |
| Jc1NS5Au6521                 | Fw    | CAGGGGACCTTTCCTATCAATTGCT                                                 | 6521                  |
| Jc1NS5Ad7211                 | Rv    | GCCGTGCCCAAGCCGGTA                                                        | 7211                  |
| Jc1NS5AM13u6693 <sup>e</sup> | Fw    | <u>GTTGTAAAACGACGGCCAGTGCCA</u> ACTACCTTCT<br>CCAGAGTTTT                  | 6693                  |
| Jc1NS5AM13d7131 <sup>e</sup> | Rv    | <u>CACAGGAAACAGCTATGACCCTCTCTTCCTC</u><br>GGCCATTGGCT                     | 7131                  |

<sup>a</sup>According to JFH-1 accession number #AB047639

<sup>b</sup>Underlined nucleotides indicate modifications of the genomic sequence introduced to express NS5A with substitution N248H

<sup>c</sup>Underlined nucleotides indicate modifications of the genomic sequence introduced to express NS5A with substitution E269K

<sup>d</sup>Underlined nucleotides indicate modifications of the genomic sequence introduced to express NS5A with substitution A346V

<sup>e</sup>Underlined nucleotides indicate universal M13 oligonucleotide
