# Supplementary material for: Pipeline for specific subtype amplification and drug resistance detection in hepatitis C virus
Source: PubMed Central journal article supplement (PMC6122477; doi:10.1186/s12879-018-3356-6), 2018-09-03
Supplement: 12879_2018_3356_MOESM5_ESM.pdf [file 12879_2018_3356_MOESM5_ESM.pdf]

## RT-PCR NS5A (2)

| (5'-3') (Forward) |      |      |      |      |      |      |      |      |      |      |      |      |      |      |      |      |      |      |      |      |      |      |      |      |      |      |      |      |      |
|-------------------|------|------|------|------|------|------|------|------|------|------|------|------|------|------|------|------|------|------|------|------|------|------|------|------|------|------|------|------|------|
| Subtypes          | 6227 | 6228 | 6229 | 6230 | 6231 | 6232 | 6233 | 6234 | 6235 | 6236 | 6237 | 6238 | 6239 | 6240 | 6241 | 6242 | 6243 | 6244 | 6245 | 6246 | 6247 | 6248 | 6249 | 6250 | 6251 | 6252 | 6253 | 6254 | 6255 |
| 1a                |      |      |      |      |      |      |      | A    | G    | C    | T    | C    | G    | G    | A    | G    | T    | G    | Y    | A    | C    | C    | A    | C    | T    | C    | C    | R    | T    |
| 1b                |      |      |      |      |      |      |      | A    | A    | Y    | G    | A    | G    | G    | A    | C    | T    | G    | C    | T    | C    | C    | A    | C    | G    | C    | C    | A    | T    |
| 2a                |      |      |      |      |      |      |      | A    | C    | T    | G    | A    | G    | G    | A    | C    | T    | G    | C    | C    | C    | C    | A    | T    | C    | C    | C    | A    | T    |
| 2b                |      |      |      | G    | A    | T    | C    | A    | C    | T    | G    | A    | A    | G    | A    | T    | T    | G    | C    | C    | C    | A    | G    | T    | C    | C    | C    | A    | T    |
| 2c                |      |      |      |      |      |      |      |      |      |      | G    | A    | R    | G    | A    | Y    | T    | G    | C    | C    | C    | Y    | G    | T    | C    | C    | C    | T    |      |
| 2j                |      |      | G    | G    | A    | T    | C    | A    | C    | T    | G    | A    | G    | G    | A    | C    | T    | G    | Y    | C    | C    | C    | G    | T    |      |      |      |      |      |
| 3a                |      |      | G    | A    | T    | C    | A    | A    | T    | G    | A    | A    | G    | A    | C    | T    | A    | C    | C    | C    | A    | A    | G    | Y    | C    | C    | T    | T    |      |
| 4a                |      |      | G    | A    | T    | C    | A    | A    | T    | G    | A    | A    | G    | A    | T    | G    | Y    | T    | C    | C    | A    | A    | G    | Y    | C    | C    | A    | T    |      |
| 4d                |      |      |      |      |      |      |      | A    | A    | C    | G    | A    | G    | G    | A    | C    | T    | G    | C    | T    | C    | T    | A    | C    | T    | C    | C    | A    | T    |
| 4f                | G    | T    | G    | G    | A    | T    | C    | A    | A    | T    | G    | A    | A    | G    | A    | C    | T    | G    | Y    | C    | C    | Y    | A    | C    | T    |      |      |      |      |

  

| (5'-3') (Reverse) |      |      |      |      |      |      |      |      |      |      |      |      |      |      |      |      |      |      |      |      |      |      |      |      |      |      |      |      |      |      |   |   |
|-------------------|------|------|------|------|------|------|------|------|------|------|------|------|------|------|------|------|------|------|------|------|------|------|------|------|------|------|------|------|------|------|---|---|
| Subtypes          | 6882 | 6881 | 6880 | 6879 | 6878 | 6877 | 6876 | 6875 | 6874 | 6873 | 6872 | 6871 | 6870 | 6869 | 6868 | 6867 | 6866 | 6865 | 6864 | 6863 | 6862 | 6861 | 6860 | 6859 | 6858 | 6857 | 6856 | 6855 | 6854 | 6853 |   |   |
| 1a                |      |      |      | G    | G    | G    | A    | G    | G    | G    | A    | T    | C    | G    | G    | T    | G    | A    | G    | C    | A    | T    | G    | G    | A    |      |      |      |      |      |   |   |
| 1b                |      |      |      | G    | G    | G    | A    | G    | G    | G    | A    | T    | C    | G    | G    | T    | G    | A    | G    | C    | A    | T    | G    | G    | A    |      |      |      |      |      |   |   |
| 2a                |      |      | T    | G    | G    | G    | A    | Y    | G    | G    | A    | T    | C    | T    | G    | T    | T    | A    | G    | C    | A    | T    | G    | G    | A    |      |      |      |      |      |   |   |
| 2b                |      |      |      | G    | G    | G    | A    | C    | G    | G    | A    | T    | C    | T    | G    | T    | C    | A    | A    | C    | A    | T    | G    | G    | A    |      |      |      |      |      |   |   |
| 2c                | T    | G    | T    | G    | G    | G    | A    | Y    | G    | G    | G    | T    | C    | Y    | G    | T    | T    | A    | G    | C    | A    | T    | G    | G    | A    |      |      |      |      |      |   |   |
| 2j                |      |      |      | G    | G    | G    | A    | Y    | G    | G    | G    | T    | C    | C    | G    | T    | C    | A    | G    | C    | A    | T    | G    | G    | A    |      |      |      |      |      |   |   |
| 3a                |      |      |      |      |      |      |      |      | G    | G    | G    | T    | C    | T    | C    | T    | C    | A    | A    | C    | A    | T    | C    | G    | A    | G    | G    | A    | G    | T    | C | A |
| 4a                |      |      |      | G    | T    | G    | A    | T    | G    | G    | G    | T    | C    | T    | G    | T    | C    | A    | R    | C    | A    | T    | G    | G    | A    |      | G    | G    | T    | C    | A |   |
| 4d                |      |      |      | G    | A    | G    | A    | T    | G    | G    | A    | T    | C    | T    | G    | T    | C    | A    | G    | C    | A    | T    | A    | G    | A    |      |      |      |      |      |   |   |
| 4f                |      |      |      | G    | G    | G    | A    | T    | G    | G    | G    | T    | C    | T    | G    | T    | A    | A    | G    | C    | A    | T    | G    | G    | A    |      |      |      |      |      |   |   |

## PCR NS5A (2.1)

| (5'-3') (Forward) |      |      |      |      |      |      |      |      |      |      |      |      |      |      |      |      |      |      |      |      |      |      |      |      |      |      |      |
|-------------------|------|------|------|------|------|------|------|------|------|------|------|------|------|------|------|------|------|------|------|------|------|------|------|------|------|------|------|
| Subtypes          | 6299 | 6300 | 6301 | 6302 | 6303 | 6304 | 6305 | 6306 | 6307 | 6308 | 6309 | 6310 | 6311 | 6312 | 6313 | 6314 | 6315 | 6316 | 6317 | 6318 | 6319 | 6320 | 6321 | 6322 | 6323 | 6324 | 6325 |
| 1a                | G    | G    | T    | G    | C    | T    | G    | A    | G    | C    | G    | A    | Y    | T    | T    | T    | A    | A    | G    | A    | C    | C    | T    | G    | G    | C    | T    |
| 1b                | G    | G    | T    | G    | C    | T    | G    | A    | C    | T    | G    | A    | Y    | T    | T    | C    | A    | A    | G    | A    | C    | C    | T    | G    | G    | C    | T    |
| 2a                | C    | A    | T    | C    | C    | T    | R    | A    | C    | A    | G    | A    | C    | T    | T    | Y    | A    | A    | A    | A    | A    | Y    | T    | G    | G    | C    | T    |
| 2b                | C    | A    | T    | Y    | C    | T    | C    | A    | C    | A    | G    | A    | C    | T    | T    | T    | A    | A    | G    | A    | A    | C    | T    | G    | G    | C    | T    |
| 2c                | R    | A    | T    | C    | C    | T    | G    | A    | C    | A    | G    | A    | C    | T    | T    | Y    | A    | A    | G    | A    | R    | T    | T    | G    | G    | C    | T    |
| 2j                | C    | A    | T    | C    | T    | T    | G    | A    | C    | T    | G    | A    | C    | T    | T    | Y    | A    | A    | R    | A    | A    | Y    | T    | G    | G    | C    | T    |
| 3a                | G    | G    | T    | G    | Y    | T    | G    | T    | C    | Y    | G    | A    | C    | T    | T    | C    | A    | A    | G    | A    | C    | A    | T    | G    | G    | C    | T    |
| 4a                | C    | G    | T    | G    | C    | T    | G    | A    | G    | T    | G    | A    | C    | T    | T    | C    | A    | A    | G    | A    | C    | G    | T    | G    | G    | C    | T    |
| 4d                | C    | G    | T    | A    | C    | T    | G    | A    | G    | T    | G    | A    | C    | T    | T    | T    | A    | A    | A    | A    | C    | G    | T    | G    | G    | C    | T    |
| 4f                | C    | G    | T    | A    | Y    | T    | G    | T    | C    | T    | G    | A    | C    | T    | T    | Y    | A    | A    | G    | A    | C    | Y    | T    | G    | G    | C    | T    |

  

| (5'-3') (Reverse) |      |      |      |      |      |      |      |      |      |      |      |      |      |      |      |      |      |      |      |      |      |  |  |  |  |  |  |
|-------------------|------|------|------|------|------|------|------|------|------|------|------|------|------|------|------|------|------|------|------|------|------|--|--|--|--|--|--|
| Subtypes          | 6735 | 6734 | 6733 | 6732 | 6731 | 6730 | 6729 | 6728 | 6727 | 6726 | 6725 | 6724 | 6723 | 6722 | 6721 | 6720 | 6719 | 6718 | 6717 | 6716 | 6715 |  |  |  |  |  |  |
| 1a                | T    | A    | T    | G    | Y    | A    | R    | G    | C    | G    | C    | A    | C    | C    | C    | C    | G    | T    | C    | C    | A    |  |  |  |  |  |  |
| 1b                | T    | G    | T    | G    | C    | A    | R    | C    | C    | G    | Y    | A    | C    | C    | C    | C    | R    | T    | C    | C    | A    |  |  |  |  |  |  |
| 2a                | T    | R    | T    | G    | G    | A    | T    | Y    | T    | G    | C    | A    | C    | T    | C    | C    | G    | T    | C    | C    | A    |  |  |  |  |  |  |
| 2b                | G    | G    | T    | G    | T    | A    | T    | Y    | T    | G    | C    | A    | C    | C    | C    | C    | G    | T    | C    | C    | A    |  |  |  |  |  |  |
| 2c                | G    | A    | T    | G    | G    | A    | T    | Y    | T    | G    | R    | A    | C    | Y    | C    | C    | G    | T    | C    | C    | A    |  |  |  |  |  |  |
| 2j                | G    | R    | T    | G    | G    | A    | T    | C    | T    | G    | Y    | A    | C    | C    | C    | C    | R    | T    | C    | C    | A    |  |  |  |  |  |  |
| 3a                | G    | G    | T    | G    | G    | A    | G    | T    | C    | T    | C    | A    | C    | C    | C    | C    | R    | T    | C    | C    | A    |  |  |  |  |  |  |
| 4a                | G    | G    | T    | G    | T    | A    | G    | Y    | C    | T    | G    | A    | Y    | G    | C    | C    | G    | T    | C    | Y    | A    |  |  |  |  |  |  |
| 4d                | G    | A    | T    | G    | G    | A    | G    | C    | C    | T    | G    | A    | C    | G    | C    | C    | A    | T    | C    | C    | A    |  |  |  |  |  |  |
| 4f                | G    | G    | T    | G    | A    | A    | K    | T    | C    | T    | R    | A    | C    | R    | C    | C    | A    | T    | C    | C    | A    |  |  |  |  |  |  |

## PCR NS5A (2.2)

| (5'-3') (Forward) |      |      |      |      |      |      |      |      |      |      |      |      |      |      |      |      |      |      |      |      |      |      |      |      |      |      |      |  |
|-------------------|------|------|------|------|------|------|------|------|------|------|------|------|------|------|------|------|------|------|------|------|------|------|------|------|------|------|------|--|
| Subtypes          | 6256 | 6257 | 6258 | 6259 | 6260 | 6261 | 6262 | 6263 | 6264 | 6265 | 6266 | 6267 | 6268 | 6269 | 6270 | 6271 | 6272 | 6273 | 6274 | 6275 | 6276 | 6277 | 6278 | 6279 | 6280 | 6281 | 6282 |  |
| 1a                |      |      |      |      | C    | G    | G    | T    | T    | C    | C    | T    | G    | G    | C    | T    | A    | A    | G    | G    | G    | A    | C    | A    | T    |      |      |  |
| 1b                |      |      |      | C    | C    | G    | G    | C    | T    | C    | G    | T    | G    | G    | C    | T    | A    | A    | G    | G    | G    | A    | C    | A    | T    |      |      |  |
| 2a                |      |      |      |      | C    | G    | G    | M    | T    | C    | V    | T    | G    | G    | C    | T    | C    | C    | G    | C    | G    | A    | Y    | G    | T    |      |      |  |
| 2b                |      |      |      |      | G    | G    | G    | G    | T    | C    | T    | T    | G    | G    | C    | T    | C    | C    | R    | G    | G    | A    |      |      |      |      |      |  |
| 2c                | G    | C    | T    | C    | Y    | R    | G    | C    | T    | C    | A    | T    | G    | G    | C    | T    | Y    | C    | G    | A    | G    | A    |      |      |      |      |      |  |
| 2j                |      |      |      |      | G    | G    | C    | T    | C    | T    | T    | G    | G    | C    | T    | T    | C    | G    | C    | G    | A    | C    | A    | T    | A    | T    |      |  |
| 3a                |      |      |      |      | C    | G    | G    | Y    | G    | A    | T    | T    | G    | G    | C    | T    | G    | C    | G    | T    | A    | C    | C    | A    | T    |      |      |  |
| 4a                |      |      |      |      | C    | G    | A    | A    | T    | C    | T    | T    | G    | G    | C    | T    | R    | T    | G    | G    | A    | G    | G    | T    |      |      |      |  |
| 4d                | G    | T    | G    | A    | T    | C    | G    | C    | T    | C    | T    | T    | G    | G    | T    | A    | T    | G    | G    | A    | G    | A    | T    |      |      |      |      |  |
| 4f                | G    | T    | G    | A    | C    | T    | C    | A    | T    | C    | Y    | T    | G    | G    | C    | C    | T    | R    | T    | G    | G    | A    | T    |      |      |      |      |  |

  

| (5'-3') (Reverse) |      |      |      |      |      |      |      |      |      |      |      |      |      |      |      |      |      |      |      |      |      |      |      |      |      |      |      |      |      |
|-------------------|------|------|------|------|------|------|------|------|------|------|------|------|------|------|------|------|------|------|------|------|------|------|------|------|------|------|------|------|------|
| Subtypes          | 6799 | 6798 | 6797 | 6796 | 6795 | 6794 | 6793 | 6792 | 6791 | 6790 | 6789 | 6788 | 6787 | 6786 | 6785 | 6784 | 6783 | 6782 | 6781 | 6780 | 6779 | 6778 | 6777 | 6776 | 6775 | 6774 | 6773 | 6772 | 6771 |
| 1a                | T    | C    | G    | T    | G    | K    | A    | G    | T    | C    | C    | Y    | A    | C    | T    | C    | T    | G    | A    | A    | Y    | G    | A    |      |      |      |      |      |      |
| 1b                | T    | G    | G    | T    | T    | G    | A    | G    | C    | C    | C    | G    | A    | C    | C    | C    | T    | G    | A    | A    | T    | G    | T    |      |      |      |      |      |      |
| 2a                |      |      |      |      |      |      | A    | G    | C    | C    | C    | A    | A    | C    | G    | C    | W    | R    | A    | A    | C    | G    | A    | G    | A    | C    | C    | T    | C    |
| 2b                | G    | A    | A    | T    | T    | G    | A    | G    | C    | C    | C    | Y    | A    | C    | R    | G    | T    | G    | A    | A    | C    | G    | T    |      |      |      |      |      |      |
| 2c                | G    | A    | A    | T    | T    | G    | A    | G    | M    | C    | C    | A    | A    | C    | G    | C    | W    | G    | A    | A    | C    | G    | A    |      |      |      |      |      |      |
| 2j                | G    | A    | A    | T    | T    | G    | A    | G    | C    | C    | C    | A    | C    | A    | C    | G    | C    | T    | A    | A    | A    | C    | G    | A    |      |      |      |      |      |
| 3a                | G    | A    | A    | T    | T    | C    | A    | W    | C    | C    | C    | T    | A    | C    | C    | R    | T    | G    | A    | A    | A    | G    | T    | G    | A    | T    |      |      |      |
| 4a                | G    | A    | A    | T    | T    | G    | A    | G    | T    | C    | C    | T    | A    | C    | Y    | G    | A    | G    | A    | A    | C    | G    | A    |      |      |      |      |      |      |
| 4d                | G    | T    | G    | T    | T    | G    | A    | G    | G    | C    | C    | A    | C    | T    | G    | T    | A    | T    | G    | G    | A    | G    | A    | T    |      |      |      |      |      |
| 4f                | A    | A    | G    | T    | T    | R    | A    | G    | G    | C    | C    | C    | A    | C    | G    | G    | A    | G    | A    | A    | C    | G    | A    |      |      |      |      |      |      |

**Figure S2. Subtype-specific oligonucleotides designed to sequence the NS5A-coding region.** Residue numbering is according to the reference strain AF009606. Positions in red are conserved among the different subtypes, and positions with different colors are discriminatory of a specific subtype (color codes given in the left column at each panel). Discriminatory positions for genotype are highlighted in pink.
