# Supplementary material for: Pipeline for specific subtype amplification and drug resistance detection in hepatitis C virus
Source: PubMed Central journal article supplement (PMC6122477; doi:10.1186/s12879-018-3356-6), 2018-09-03
Supplement: 12879_2018_3356_MOESM6_ESM.pdf [file 12879_2018_3356_MOESM6_ESM.pdf]

## RT-PCR NS5B (3)

## (5'-3') (Forward)

| Subtypes | 7952 | 7953 | 7954 | 7955 | 7956 | 7957 | 7958 | 7959 | 7960 | 7961 | 7962 | 7963 | 7964 | 7965 | 7966 | 7967 | 7968 | 7969 | 7970 |
|----------|------|------|------|------|------|------|------|------|------|------|------|------|------|------|------|------|------|------|------|
| 1a       | C    | C    | A    | C    | A    | T    | C    | A    | A    | C    | T    | C    | C    | G    | T    | G    | T    | G    | G    |
| 1b       | C    | C    | A    | C    | A    | T    | C    | C    | R    | C    | T    | C    | C    | G    | T    | G    | T    | G    | G    |
| 2a       | C    | C    | A    | C    | A    | T    | C    | A    | A    | G    | T    | C    | C    | G    | T    | G    | T    | G    | G    |
| 2b       | C    | C    | A    | C    | A    | T    | C    | C    | G    | G    | T    | C    | C    | G    | T    | G    | T    | G    | G    |
| 2c       | C    | C    | A    | C    | A    | T    | C    | A    | A    | G    | T    | C    | C    | G    | T    | G    | T    | G    | G    |
| 2j       | C    | C    | A    | C    | A    | T    | C    | M    | A    | G    | T    | C    | C    | G    | T    | G    | T    | G    | G    |
| 3a       | C    | C    | A    | G    | A    | T    | C    | C    | G    | C    | T    | C    | C    | G    | T    | C    | T    | G    | G    |
| 4a       | C    | C    | A    | C    | A    | T    | C    | A    | R    | C    | T    | C    | C    | G    | T    | G    | T    | G    | G    |
| 4d       | C    | C    | A    | C    | A    | T    | C    | A    | A    | C    | T    | C    | C    | G    | T    | G    | T    | G    | G    |
| 4f       | C    | C    | A    | C    | A    | T    | C    | A    | A    | C    | T    | C    | C    | G    | T    | G    | T    | G    | G    |

## (5'-3') (Reverse)

| Subtypes | 8652 | 8651 | 8650 | 8649 | 8648 | 8647 | 8646 | 8645 | 8644 | 8643 | 8642 | 8641 | 8640 | 8639 | 8638 | 8637 | 8636 | 8635 | 8634 | 8633 | 8632 | 8631 |
|----------|------|------|------|------|------|------|------|------|------|------|------|------|------|------|------|------|------|------|------|------|------|------|
| 1a       |      |      |      | G    | G    | G    | R    | G    | C    | G    | G    | A    | G    | T    | A    | C    | C    | T    | G    | G    | T    |      |
| 1b       |      |      | G    | G    | G    | G    | G    | G    | C    | A    | G    | A    | G    | T    | A    | C    | C    | T    | A    | G    | T    |      |
| 2a       | C    | A    | G    | G    | A    | G    | G    | G    | C    | A    | G    | A    | R    | T    | A    | C    | C    | T    | G    | G    | T    |      |
| 2b       |      | G    | G    | G    | A    | G    | G    | G    | C    | R    | G    | A    | A    | T    | A    | C    | C    | T    | G    | G    | T    |      |
| 2c       |      |      | G    | R    | G    | R    | G    | R    | G    | C    | G    | A    | G    | T    | A    | C    | C    | T    | G    | G    | T    |      |
| 2j       |      |      | G    | R    | G    | G    | G    | G    | C    | G    | A    | G    | T    | A    | C    | C    | T    | G    | G    | T    |      |      |
| 3a       | C    | G    | G    | T    | G    | G    | A    | G    | C    | A    | G    | A    | A    | T    | A    | C    | C    | T    | G    | G    | T    |      |
| 4a       |      |      | G    | G    | G    | G    | A    | G    | C    | C    | G    | A    | G    | T    | A    | Y    | C    | T    | C    | G    | T    |      |
| 4d       |      |      | G    | G    | G    | G    | G    | G    | C    | Y    | G    | A    | G    | T    | A    | C    | C    | T    | C    | G    | T    |      |
| 4f       |      |      | G    | G    | G    | G    | A    | G    | C    | C    | G    | A    | R    | T    | A    | C    | C    | T    | C    | G    | T    |      |

## RT-PCR NS5B (4)

## (5'-3') (Forward)

| Subtypes | 7976 | 7977 | 7978 | 7979 | 7980 | 7981 | 7982 | 7983 | 7984 | 7985 | 7986 | 7987 | 7988 | 7989 | 7990 | 7991 | 7992 | 7993 | 7994 | 7995 | 7996 | 7997 | 7998 | 7999 | 8000 | 8001 | 8002 | 8003 |   |
|----------|------|------|------|------|------|------|------|------|------|------|------|------|------|------|------|------|------|------|------|------|------|------|------|------|------|------|------|------|---|
| 1a       |      | C    | T    | T    | C    | T    | G    | G    | A    | A    | G    | A    | C    | A    | G    | T    | G    | T    | A    | A    | C    | A    | C    | C    | A    | A    | T    | A    |   |
| 1b       | C    | T    | T    | G    | C    | T    | G    | G    | A    | A    | G    | A    | C    | A    | C    | T    | G    | A    | R    | A    | C    | A    | C    | C    | A    | A    | T    | T    |   |
| 2a       |      | C    | T    | C    | C    | T    | G    | G    | A    | A    | G    | A    | C    | T    | C    | A    | C    | A    | A    | A    | C    | A    | C    | C    | A    | A    | T    | T    |   |
| 2b       |      | C    | T    | C    | C    | T    | G    | G    | A    | A    | G    | A    | C    | C    | A    | A    | C    | A    | T    | A    | C    | Y    | C    | C    | A    | A    | T    | T    |   |
| 2c       |      | C    | T    | C    | C    | T    | G    | G    | A    | A    | G    | A    | C    | C    | A    | Y    | T    | G    | Y    | T    | C    | A    | C    | C    | A    | A    | T    | T    |   |
| 2j       |      | C    | T    | T    | T    | T    | G    | G    | A    | G    | A    | C    | T    | C    | A    | R    | A    | C    | A    | C    | A    | C    | C    | A    | A    | T    | T    |      |   |
| 3a       | C    | T    | T    | G    | C    | T    | G    | G    | A    | A    | G    | A    | C    | A    | C    | Y    | A    | C    | A    | A    | C    | T    | C    | C    | A    | A    | T    | T    |   |
| 4a       | C    | T    | T    | G    | C    | T    | G    | G    | A    | A    | G    | A    | C    | A    | A    | C    | A    | A    | T    | A    | C    | C    | C    | C    | A    | A    | T    | A    |   |
| 4d       |      |      |      |      |      |      | G    | G    | A    | A    | G    | A    | C    | A    | A    | C    | A    | C    | T    | A    | C    | C    | C    | C    | C    | A    | T    | C    |   |
| 4f       | C    | T    | T    | G    | C    | T    | G    | G    | A    | A    | G    | A    | C    | A    | A    | C    | A    | C    | A    | A    | C    | C    | C    | C    | C    | T    | A    | T    | T |

## (5'-3') (Reverse)

| Subtypes | 8652 | 8651 | 8650 | 8649 | 8648 | 8647 | 8646 | 8645 | 8644 | 8643 | 8642 | 8641 | 8640 | 8639 | 8638 | 8637 | 8636 | 8635 | 8634 | 8633 | 8632 | 8631 |
|----------|------|------|------|------|------|------|------|------|------|------|------|------|------|------|------|------|------|------|------|------|------|------|
| 1a       |      |      |      | G    | G    | G    | R    | G    | C    | G    | G    | A    | G    | T    | A    | C    | C    | T    | G    | G    | T    |      |
| 1b       |      |      | G    | G    | G    | G    | G    | G    | C    | A    | G    | A    | G    | T    | A    | C    | C    | T    | A    | G    | T    |      |
| 2a       | C    | A    | G    | G    | A    | G    | G    | G    | C    | A    | G    | A    | R    | T    | A    | C    | C    | T    | A    | G    | T    |      |
| 2b       |      | G    | G    | G    | A    | G    | G    | G    | C    | R    | G    | A    | A    | T    | A    | C    | C    | T    | G    | G    | T    |      |
| 2c       |      |      | G    | R    | G    | R    | G    | R    | G    | C    | G    | A    | G    | T    | A    | C    | C    | T    | G    | G    | T    |      |
| 2j       |      |      | G    | R    | G    | G    | G    | G    | C    | G    | A    | G    | T    | A    | C    | C    | T    | G    | G    | T    |      |      |
| 3a       | C    | G    | G    | T    | G    | G    | A    | G    | C    | A    | G    | A    | A    | T    | A    | C    | C    | T    | G    | G    | T    |      |
| 4a       |      |      | G    | G    | G    | G    | A    | G    | C    | C    | G    | A    | G    | T    | A    | Y    | C    | T    | C    | G    | T    |      |
| 4d       |      |      | G    | G    | G    | G    | G    | G    | C    | Y    | G    | A    | G    | T    | A    | C    | C    | T    | C    | G    | T    |      |
| 4f       |      |      | G    | G    | G    | G    | A    | G    | C    | C    | G    | A    | R    | T    | A    | C    | C    | T    | C    | G    | T    |      |

## RT-PCR NS5B (5)

## (5'-3') (Forward)

| Subtypes | 9376 | 9377 | 9378 | 9369 | 9368 | 9367 | 9366 | 9365 | 9364 | 9363 | 9362 | 9361 | 9360 | 9359 | 9358 | 9357 | 9356 | 9355 | 9354 | 9353 | 9352 | 9351 | 9350 |   |   |   |   |   |   |
|----------|------|------|------|------|------|------|------|------|------|------|------|------|------|------|------|------|------|------|------|------|------|------|------|---|---|---|---|---|---|
| 1a       |      | C    | T    | T    | C    | T    | G    | G    | A    | A    | G    | A    | C    | A    | G    | T    | G    | T    | A    | A    | C    | A    | C    | C | A | A | T | A |   |
| 1b       | C    | T    | T    | G    | C    | T    | G    | G    | A    | A    | G    | A    | C    | A    | C    | T    | G    | A    | R    | A    | C    | A    | C    | C | A | A | T | T |   |
| 2a       |      | C    | T    | C    | C    | T    | G    | G    | A    | A    | G    | A    | C    | T    | C    | A    | C    | A    | A    | A    | C    | A    | C    | C | A | A | T | T |   |
| 2b       |      | C    | T    | C    | C    | T    | G    | G    | A    | A    | G    | A    | C    | C    | A    | A    | C    | A    | T    | A    | C    | Y    | C    | C | A | A | T | T |   |
| 2c       |      | C    | T    | C    | C    | T    | G    | G    | A    | A    | G    | A    | C    | C    | A    | Y    | T    | G    | Y    | T    | C    | A    | C    | C | A | A | T | T |   |
| 2j       |      | C    | T    | T    | T    | T    | G    | G    | A    | G    | A    | C    | T    | C    | A    | R    | A    | C    | A    | C    | A    | C    | C    | A | A | T | T |   |   |
| 3a       | C    | T    | T    | G    | C    | T    | G    | G    | A    | A    | G    | A    | C    | A    | C    | Y    | A    | C    | A    | A    | C    | T    | C    | C | A | A | T | T |   |
| 4a       | C    | T    | T    | G    | C    | T    | G    | G    | A    | A    | G    | A    | C    | A    | A    | C    | A    | A    | T    | A    | C    | C    | C    | C | A | A | T | A |   |
| 4d       |      |      |      |      |      |      | G    | G    | A    | A    | G    | A    | C    | A    | A    | C    | A    | C    | T    | A    | C    | C    | C    | C | C | A | T | C |   |
| 4f       | C    | T    | T    | G    | C    | T    | G    | G    | A    | A    | G    | A    | C    | A    | A    | C    | A    | C    | A    | A    | C    | C    | C    | C | C | T | A | T | T |

## (5'-3') (Reverse)

| Subtypes | 9372 | 9371 | 9370 | 9369 | 9368 | 9367 | 9366 | 9365 | 9364 | 9363 | 9362 | 9361 | 9360 | 9359 | 9358 | 9357 | 9356 | 9355 | 9354 | 9353 | 9352 | 9351 | 9350 |
|----------|------|------|------|------|------|------|------|------|------|------|------|------|------|------|------|------|------|------|------|------|------|------|------|
| 1a       | G    | G    | T    | T    | G    | G    | G    | G    | A    | G    | G    | A    | G    | G    | T    | A    | G    | A    | T    | G    | C    | C    | T    |
| 1b       | G    | G    | T    | T    | G    | G    | G    | G    | A    | G    | C    | A    | G    | G    | T    | A    | G    | A    | T    | G    | C    | C    | T    |
| 2a       | G    | A    | G    | C    | G    | G    | G    | G    | A    | G    | T    | A    | G    | R    | A    | A    | G    | A    | G    | G    | C    | C    | T    |
| 2b       | G    | A    | G    | C    | G    | G    | G    | G    | A    | G    | T    | A    | A    | A    | A    | A    | G    | A    | T    | G    | C    | C    | T    |
| 2c       | G    | A    | G    | C    | G    | G    | G    | G    | A    | G    | T    | A    | R    | G    | A    | A    | G    | A    | T    | G    | C    | C    | T    |
| 2j       | G    | A    | G    | C    | G    | G    | G    | G    | A    | G    | T    | A    | A    | A    | A    | A    | G    | A    | T    | G    | C    | C    | T    |
| 3a       | G    | W    | G    | C    | T    | G    | G    | C    | A    | G    | G    | A    | G    | A    | T    | A    | G    | A    | T    | G    | C    | C    | T    |
| 4a       | G    | A    | G    | C    | A    | G    | G    | C    | A    | G    | C    | A    | G    | G    | T    | A    | G    | A    | T    | G    | C    | C    | T    |
| 4d       | G    | A    | G    | C    | R    | G    | G    | C    | A    | G    | C    | A    | G    | G    | T    | A    | G    | A    | T    | G    | C    | C    | T    |
| 4f       | G    | A    | G    | C    | A    | G    | G    | C    | A    | G    | C    | A    | R    | R    | T    | A    | G    | A    | T    | G    | C    | C    | T    |

**Figure S3. Subtype-specific oligonucleotides designed to sequence the NS5B-coding region.** Residue numbering is according to the reference strain AF009606. Positions in red are conserved among the different subtypes, and positions with different colors are discriminatory of a specific subtype (color codes given in the left column at each panel). Discriminatory positions for genotype are highlighted in pink.

PCR NS5B (3.1)

(5'- 3') (Forward)

| Subtypes | 7952 | 7953 | 7954 | 7955 | 7956 | 7957 | 7958 | 7959 | 7960 | 7961 | 7962 | 7963 | 7964 | 7965 | 7966 | 7967 | 7968 | 7969 | 7970 |
|----------|------|------|------|------|------|------|------|------|------|------|------|------|------|------|------|------|------|------|------|
| 1a       | C    | C    | A    | C    | A    | T    | C    | A    | A    | C    | T    | C    | C    | G    | T    | G    | T    | G    | G    |
| 1b       | C    | C    | A    | C    | A    | T    | C    | C    | R    | C    | T    | C    | C    | G    | T    | G    | T    | G    | G    |
| 2a       | C    | C    | A    | C    | A    | T    | C    | A    | A    | G    | T    | C    | C    | G    | T    | G    | T    | G    | G    |
| 2b       | C    | C    | A    | C    | A    | T    | C    | C    | G    | T    | C    | C    | G    | T    | G    | T    | G    | G    | G    |
| 2c       | C    | C    | A    | C    | A    | T    | C    | A    | A    | G    | T    | C    | C    | G    | T    | G    | T    | G    | G    |
| 2j       | C    | C    | A    | C    | A    | T    | C    | M    | A    | G    | T    | C    | C    | G    | T    | G    | T    | G    | G    |
| 3a       | C    | C    | A    | G    | A    | T    | C    | C    | G    | C    | T    | C    | C    | G    | T    | C    | T    | G    | G    |
| 4a       | C    | C    | A    | C    | A    | T    | C    | A    | R    | C    | T    | C    | C    | G    | T    | G    | T    | G    | G    |
| 4d       | C    | C    | A    | C    | A    | T    | C    | A    | A    | C    | T    | C    | C    | G    | T    | G    | T    | G    | G    |
| 4f       | C    | C    | A    | C    | A    | T    | C    | A    | A    | C    | T    | C    | C    | G    | T    | G    | T    | G    | G    |

(5'- 3') (Reverse)

| Subtypes | 8389 | 8388 | 8387 | 8386 | 8385 | 8384 | 8383 | 8382 | 8381 | 8380 | 8379 | 8378 | 8377 | 8376 | 8375 | 8374 | 8373 | 8372 | 8371 | 8370 | 8369 | 8368 | 8367 |
|----------|------|------|------|------|------|------|------|------|------|------|------|------|------|------|------|------|------|------|------|------|------|------|------|
| 1a       | C    | C    | R    | A    | C    | A    | T    | A    | A    | A    | G    | C    | C    | T    | C    | T    | C    | R    | G    | T    | G    | A    | G    |
| 1b       | C    | C    | G    | A    | T    | R    | T    | A    | A    | A    | G    | C    | C    | G    | C    | T    | C    | T    | G    | T    | G    | A    | G    |
| 2a       | C    | C    | Y    | A    | C    | R    | T    | A    | A    | A    | G    | T    | C    | T    | C    | T    | C    | A    | G    | T    | C    | A    | G    |
| 2b       | C    | C    | T    | A    | C    | G    | T    | A    | R    | A    | G    | T    | C    | T    | C    | T    | C    | A    | G    | T    | G    | A    | G    |
| 2c       | C    | C    | Y    | A    | C    | G    | T    | A    | H    | A    | G    | T    | C    | T    | C    | T    | C    | A    | G    | T    | C    | A    | G    |
| 2j       | C    | C    | C    | A    | C    | G    | T    | A    | R    | A    | G    | T    | C    | T    | C    | T    | C    | A    | G    | T    | G    | A    | G    |
| 3a       | C    | C    | G    | C    | A    | G    | T    | A    | A    | A    | G    | C    | C    | G    | C    | T    | C    | C    | G    | T    | G    | A    | G    |
| 4a       | C    | C    | C    | A    | C    | R    | T    | A    | G    | A    | G    | T    | C    | T    | Y    | T    | C    | T    | G    | T    | G    | A    | G    |
| 4d       | C    | C    | C    | A    | C    | G    | T    | A    | G    | A    | G    | T    | C    | T    | C    | T    | C    | T    | G    | T    | G    | A    | G    |
| 4f       | C    | C    | C    | A    | C    | R    | T    | A    | G    | A    | G    | T    | C    | T    | Y    | T    | C    | A    | G    | T    | G    | A    | G    |

PCR NS5B (3.2)

(5'- 3') (Forward)

| Subtypes | 8142 | 8143 | 8144 | 8145 | 8146 | 8147 | 8148 | 8149 | 8150 | 8151 | 8152 | 8153 | 8154 | 8155 | 8156 | 8157 | 8158 | 8159 | 8160 | 8161 | 8162 | 8163 | 8164 |
|----------|------|------|------|------|------|------|------|------|------|------|------|------|------|------|------|------|------|------|------|------|------|------|------|
| 1a       | A    | A    | G    | C    | T    | C    | C    | C    | Y    | C    | T    | G    | G    | C    | C    | G    | T    | G    | A    | T    | G    | G    | G    |
| 1b       | A    | A    | C    | C    | T    | T    | C    | C    | T    | C    | A    | G    | G    | C    | C    | G    | T    | G    | A    | T    | G    | G    | G    |
| 2a       | A    | A    | G    | C    | T    | T    | C    | C    | T    | C    | A    | G    | G    | C    | C    | G    | T    | G    | A    | T    | G    | G    | G    |
| 2b       | A    | A    | G    | C    | T    | T    | C    | C    | C    | A    | R    | G    | C    | A    | R    | T    | A    | A    | T    | G    | G    | G    | G    |
| 2c       | A    | A    | G    | C    | T    | T    | C    | C    | C    | G    | T    | C    | G    | C    | R    | G    | T    | G    | A    | T    | G    | G    | G    |
| 2j       | A    | A    | A    | C    | T    | Y    | C    | C    | C    | A    | G    | G    | C    | R    | G    | T    | G    | A    | T    | G    | G    | G    | G    |
| 3a       | A    | A    | G    | T    | T    | G    | T    | C    | A    | A    | T    | G    | M    | G    | A    | C    | G    | A    | T    | G    | G    | G    | G    |
| 4a       | M    | A    | A    | C    | T    | A    | C    | C    | T    | R    | A    | G    | G    | C    | C    | G    | T    | G    | A    | T    | G    | G    | G    |
| 4d       | C    | A    | A    | C    | T    | T    | C    | T    | C    | T    | G    | G    | C    | C    | G    | T    | G    | A    | T    | G    | G    | G    | G    |
| 4f       | A    | A    | M    | C    | T    | C    | Y    | C    | T    | G    | A    | G    | C    | C    | G    | T    | G    | A    | T    | G    | G    | G    | G    |

(5'- 3') (antisense)

| Subtypes | 8584 | 8583 | 8582 | 8581 | 8580 | 8579 | 8578 | 8577 | 8576 | 8575 | 8574 | 8573 | 8572 | 8571 | 8570 | 8569 | 8568 | 8567 | 8566 | 8565 | 8564 | 8563 | 8562 |
|----------|------|------|------|------|------|------|------|------|------|------|------|------|------|------|------|------|------|------|------|------|------|------|------|
| 1a       | C    | C    | C    | K    | S    | A    | C    | T    | T    | T    | C    | A    | C    | A    | G    | A    | T    | A    | A    | C    | G    | A    | C    |
| 1b       | C    | C    | C    | G    | C    | A    | C    | T    | Y    | T    | C    | A    | C    | A    | G    | A    | T    | A    | A    | C    | G    | A    | C    |
| 2a       | C    | C    | C    | T    | G    | G    | C    | T    | T    | T    | C    | T    | G    | A    | G    | A    | T    | G    | A    | C    | W    | A    | C    |
| 2b       | C    | C    | T    | T    | G    | G    | C    | T    | C    | T    | C    | T    | G    | A    | G    | A    | T    | G    | A    | C    | R    | A    | C    |
| 2c       | C    | C    | Y    | T    | G    | A    | C    | T    | Y    | T    | C    | T    | G    | A    | G    | A    | T    | G    | A    | C    | G    | A    | C    |
| 2j       | C    | C    | C    | T    | G    | A    | C    | T    | C    | T    | C    | T    | G    | A    | G    | A    | T    | G    | A    | C    | R    | A    | C    |
| 3a       | C    | C    | A    | T    | C    | A    | C    | T    | C    | T    | C    | R    | G    | C    | C    | A    | C    | C    | A    | C    | R    | A    | C    |
| 4a       | C    | C    | G    | T    | C    | G    | C    | T    | C    | T    | C    | A    | G    | C    | G    | A    | T    | R    | A    | C    | G    | A    | C    |
| 4d       | C    | C    | A    | T    | C    | G    | C    | T    | T    | T    | C    | A    | G    | C    | G    | A    | T    | A    | A    | C    | G    | A    | C    |
| 4f       | C    | C    | A    | T    | C    | G    | C    | T    | T    | T    | C    | G    | G    | Y    | G    | A    | T    | A    | A    | C    | G    | A    | C    |

PCR NS5B (4.1)

(5'- 3') (Forward)

| Subtypes | 8018 | 8019 | 8020 | 8021 | 8022 | 8023 | 8024 | 8025 | 8026 | 8027 | 8028 | 8029 | 8030 | 8031 | 8032 | 8033 | 8034 | 8035 | 8036 | 8037 | 8038 | 8039 | 8040 | 8041 | 8042 | 8043 | 8044 | 8045 | 8046 | 8047 | 8048 | 8049 | 8050 | 8051 | 8052 | 8053 |  |  |  |  |
|----------|------|------|------|------|------|------|------|------|------|------|------|------|------|------|------|------|------|------|------|------|------|------|------|------|------|------|------|------|------|------|------|------|------|------|------|------|--|--|--|--|
| 1a       |      |      |      |      |      |      |      |      |      |      |      |      |      |      |      |      |      |      |      |      |      |      |      |      |      |      |      |      |      |      |      |      |      |      |      |      |  |  |  |  |
| 1b       |      |      |      |      |      |      |      |      |      |      |      |      |      |      |      |      |      |      |      |      |      |      |      |      |      |      |      |      |      |      |      |      |      |      |      |      |  |  |  |  |
| 2a       |      |      |      |      |      |      |      |      |      |      |      |      |      |      |      |      |      |      |      |      |      |      |      |      |      |      |      |      |      |      |      |      |      |      |      |      |  |  |  |  |
| 2b       |      |      |      |      |      |      |      |      |      |      |      |      |      |      |      |      |      |      |      |      |      |      |      |      |      |      |      |      |      |      |      |      |      |      |      |      |  |  |  |  |
| 2c       |      |      |      |      |      |      |      |      |      |      |      |      |      |      |      |      |      |      |      |      |      |      |      |      |      |      |      |      |      |      |      |      |      |      |      |      |  |  |  |  |
| 2j       |      |      |      |      |      |      |      |      |      |      |      |      |      |      |      |      |      |      |      |      |      |      |      |      |      |      |      |      |      |      |      |      |      |      |      |      |  |  |  |  |
| 3a       |      |      |      |      |      |      |      |      |      |      |      |      |      |      |      |      |      |      |      |      |      |      |      |      |      |      |      |      |      |      |      |      |      |      |      |      |  |  |  |  |
| 4a       |      |      |      |      |      |      |      |      |      |      |      |      |      |      |      |      |      |      |      |      |      |      |      |      |      |      |      |      |      |      |      |      |      |      |      |      |  |  |  |  |
| 4d       |      |      |      |      |      |      |      |      |      |      |      |      |      |      |      |      |      |      |      |      |      |      |      |      |      |      |      |      |      |      |      |      |      |      |      |      |  |  |  |  |
| 4f       |      |      |      |      |      |      |      |      |      |      |      |      |      |      |      |      |      |      |      |      |      |      |      |      |      |      |      |      |      |      |      |      |      |      |      |      |  |  |  |  |

(5'- 3') (Reverse)

| Subtypes | 8589 | 8588 | 8587 | 8586 | 8585 | 8584 | 8583 | 8582 | 8581 | 8580 | 8579 | 8578 | 8577 | 8576 | 8575 | 8574 | 8573 | 8572 | 8571 | 8570 | 8569 | 8568 | 8567 | 8566 |
|----------|------|------|------|------|------|------|------|------|------|------|------|------|------|------|------|------|------|------|------|------|------|------|------|------|
| 1a       | G    | G    | A    | C    | Y    | C    | C    | C    | K    | S    | A    | C    | T    | T    | T    | C    | A    | C    | A    | G    | A    | T    | A    |      |
| 1b       | G    | G    | G    | T    | T    | C    | C    | C    | C    | G    | C    | G    | C    | T    | Y    | T    | C    | A    | C    | A    | G    | A    | T    | A    |
| 2a       | C    | A    | G    | T    | C    | C    | C    | C    | T    | G    | G    | C    | T    | T    | T    | C    | T    | G    | A    | G    | A    | T    | G    |      |
| 2b       | C    | G    | T    | T    | R    | C    | C    | T    | T    | G    | G    | C    | T    | C    | T    | C    | T    | G    | A    | G    | A    | T    | G    |      |
| 2c       |      |      |      |      |      |      |      |      |      |      |      |      |      |      |      |      |      |      |      |      |      |      |      | A    |
| 2j       | C    | A    | G    | C    | Y    | C    | C    | C    | T    | G    | A    | C    | T    | Y    | T    | C    | T    | G    | A    | G    | A    | T    | G    |      |
| 3a       |      |      |      |      |      |      |      |      |      |      |      |      |      |      |      |      |      |      |      |      |      |      |      | A    |
| 4a       |      |      |      |      |      |      |      |      |      |      |      |      |      |      |      |      |      |      |      |      |      |      |      |      |
| 4d       | C    | C    | A    | C    | G    | C    | C    | A    | T    | C    | G    | C    | T    | T    | C    | A    | G    | C    | G    | A    | T    | A    |      |      |
| 4f       | C    | G    | A    | C    | A    | C    | C    | A    | T    | C    | G    | C    | T    | T    | T    | C    | G    | G    | Y    | G    | A    | T    | A    |      |

PCR NS5B (5.1)

(5'- 3') (Forward)

| Subtypes | 8494 | 8495 | 8496 | 8497 | 8498 | 8499 | 8500 | 8501 | 8502 | 8503 | 8504 | 8505 | 8506 | 8507 | 8508 | 8509 | 8510 | 8511 | 8512 | 8513 | 8514 |   |
|----------|------|------|------|------|------|------|------|------|------|------|------|------|------|------|------|------|------|------|------|------|------|---|
| 1a       | A    | G    | G    | C    | C    | C    | R    | R    | G    | C    | A    | G    | C    | C    | T    | G    | T    | C    | G    | A    | G    | G |
| 1b       | A    | G    | G    | C    | C    | W    | C    | T    | G    | C    | R    | G    | C    | C    | T    | G    | T    | C    | G    | A    | G    | G |
| 2a       | A    | A    | G    | C    | C    | C    | T    | A    | G    | C    | G    | G    | C    | Y    | T    | G    | Y    | A    | A    | G    | G    | G |
| 2b       | A    | A    | G    | C    | C    | C    | T    | T    | G    | C    | R    | G    | C    | R    | T    | G    | Y    | A    | A    | R    | G    | G |
| 2c       | A    | R    | G    | C    | C    | M    | R    | R    | G    | C    | G    | G    | C    | B    | T    | G    | Y    | A    | A    | M    | G    | G |
| 2j       | A    | G    | G    | C    | C    | Y    | T    | A    | G    | C    | R    | G    | C    | C    | T    | G    | T    | A    | A    | G    | G    | G |
| 3a       | A    | G    | G    | C    | C    | A    | C    | A    | G    | C    | G    | G    | C    | Y    | G    | C    | R    | A    | R    | G    | G    | G |
| 4a       | A    | A    | G    | C    | C    | A    | C    | R    | G    | C    | Y    | G    | C    | Y    | A    | T    | Y    | A    | R    | R    | G    | G |
| 4d       | A    | G    | G    | C    | C    | A    | G    | G    | C    | A    | G    | C    | C    | A    | T    | C    | A    | G    | G    | G    | G    | G |
| 4f       | A    | G    | G    | C    | Y    | A    | C    | R    | G    | C    | G    | G    | C    | Y    | G    | C    | Y    | A    | A    | A    | G    | G |

Figure S3 (continued)

(5' - 3') (Reverse)

| Subtypes | 8878 | 8877 | 8876 | 8875 | 8874 | 8873 | 8872 | 8871 | 8870 | 8869 | 8868 | 8867 | 8866 | 8865 | 8864 | 8863 | 8862 | 8861 | 8860 | 8859 |
|----------|------|------|------|------|------|------|------|------|------|------|------|------|------|------|------|------|------|------|------|------|
| 1a       | A    | T    | C    | A    | G    | T    | A    | T    | C    | A    | T    | Y    | C    | T    | C    | G    | C    | C    | C    | A    |
| 1b       | A    | T    | C    | A    | G    | R    | A    | T    | C    | A    | T    | C    | C    | T    | T    | G    | C    | C    | C    | A    |
| 2a       | A    | T    | Y    | A    | G    | G    | A    | C    | C    | A    | T    | G    | C    | G    | A    | R    | C    | C    | C    | A    |
| 2b       | A    | T    | T    | A    | T    | G    | A    | C    | C    | A    | T    | C    | C    | G    | A    | C    | C    | C    | C    | A    |
| 2c       | A    | T    | Y    | A    | G    | G    | A    | C    | C    | A    | T    | R    | C    | G    | C    | R    | C    | C    | C    | A    |
| 2j       | A    | T    | T    | A    | A    | G    | A    | C    | C    | A    | T    | A    | C    | G    | G    | G    | C    | C    | C    | A    |
| 3a       | A    | T    | C    | A    | R    | Y    | A    | C    | C    | A    | T    | G    | C    | G    | C    | A    | C    | C    | C    | A    |
| 4a       | A    | T    | C    | A    | R    | T    | A    | Y    | C    | A    | T    | R    | C    | G    | C    | A    | C    | C    | C    | A    |
| 4d       | A    | T    | C    | A    | A    | A    | A    | C    | C    | A    | T    | G    | C    | G    | C    | A    | C    | C    | C    | A    |
| 4f       | A    | T    | C    | A    | A    | T    | A    | T    | C    | A    | T    | G    | C    | G    | C    | A    | C    | C    | C    | A    |

PCR NS5B (5.2)

(5' - 3') (Forward)

| Subtypes | 8787 | 8788 | 8789 | 8790 | 8791 | 8792 | 8793 | 8794 | 8795 | 8796 | 8797 | 8798 | 8799 | 8800 | 8801 | 8802 | 8803 | 8804 | 8805 | 8806 | 8807 | 8808 | 8809 | 8810 |
|----------|------|------|------|------|------|------|------|------|------|------|------|------|------|------|------|------|------|------|------|------|------|------|------|------|
| 1a       | G    | C    | G    | T    | G    | G    | G    | A    | G    | A    | C    | A    | G    | C    | A    | A    | G    | A    | C    | A    | C    | A    | C    | T    |
| 1b       | G    | C    | G    | T    | G    | G    | G    | A    | G    | A    | C    | A    | G    | C    | T    | A    | G    | A    | C    | A    | C    | A    | C    | T    |
| 2a       | G    | C    | C    | T    | G    | G    | G    | A    | A    | A    | C    | A    | G    | T    | T    | A    | G    | A    | C    | A    | C    | T    | C    | C    |
| 2b       | G    | C    | T    | T    | G    | G    | G    | A    | A    | A    | C    | A    | G    | T    | A    | A    | G    | A    | C    | A    | C    | T    | C    | C    |
| 2c       | G    | C    | C    | T    | G    | G    | G    | A    | G    | A    | C    | A    | G    | C    | A    | A    | G    | A    | C    | A    | C    | T    | C    | C    |
| 2j       | G    | C    | C    | T    | G    | G    | G    | A    | A    | A    | C    | T    | G    | Y    | A    | A    | A    | R    | C    | A    | C    | T    | C    | Y    |
| 3a       | G    | C    | T    | T    | G    | G    | G    | A    | R    | A    | C    | A    | G    | C    | T    | C    | G    | T    | C    | A    | C    | A    | C    | T    |
| 4a       | G    | C    | R    | T    | G    | G    | G    | A    | G    | A    | C    | A    | G    | T    | C    | C    | C    | G    | A    | C    | A    | C    | A    | T    |
| 4d       | G    | C    | C    | T    | G    | G    | G    | A    | G    | A    | C    | A    | G    | C    | T    | C    | G    | A    | C    | A    | C    | A    | C    | T    |
| 4f       | G    | C    | G    | T    | G    | G    | G    | A    | G    | A    | C    | A    | G    | C    | C    | A    | G    | A    | C    | A    | C    | A    | C    | T    |

(5' - 3') (Reverse)

| Subtypes | 9190 | 9189 | 9188 | 9187 | 9186 | 9185 | 9184 | 9183 | 9182 | 9181 | 9180 | 9179 | 9178 | 9177 | 9176 | 9175 | 9174 | 9173 | 9172 | 9171 |
|----------|------|------|------|------|------|------|------|------|------|------|------|------|------|------|------|------|------|------|------|------|
| 1a       | A    | C    | T    | G    | C    | C    | C    | A    | R    | T    | T    | G    | A    | A    | G    | A    | G    | G    | T    | A    |
| 1b       | A    | C    | T    | G    | C    | C    | C    | A    | R    | T    | T    | G    | A    | A    | G    | A    | G    | G    | T    | A    |
| 2a       | A    | C    | C    | G    | C    | C    | C    | A    | R    | T    | T    | G    | A    | A    | G    | A    | G    | A    | T    | A    |
| 2b       | A    | C    | C    | G    | C    | C    | C    | A    | G    | T    | T    | G    | A    | A    | G    | A    | G    | A    | T    | A    |
| 2c       | A    | C    | A    | G    | C    | C    | C    | A    | G    | T    | T    | G    | A    | A    | G    | A    | G    | G    | T    | A    |
| 2j       | A    | C    | T    | G    | C    | C    | C    | A    | G    | T    | T    | R    | A    | A    | G    | A    | G    | G    | T    | A    |
| 3a       | A    | C    | C    | G    | C    | C    | C    | A    | A    | T    | T    | R    | A    | A    | G    | A    | G    | R    | T    | A    |
| 4a       | A    | C    | C    | G    | C    | C    | C    | A    | G    | T    | T    | A    | A    | A    | G    | A    | G    | G    | T    | A    |
| 4d       | A    | C    | C    | G    | C    | C    | C    | A    | G    | T    | T    | A    | A    | A    | G    | A    | G    | G    | T    | A    |
| 4f       | R    | Y    | C    | G    | C    | C    | C    | A    | G    | T    | T    | R    | A    | A    | G    | A    | G    | G    | T    | A    |

PCR NS5B (5.3)

(5' - 3') (Forward)

| Subtypes | 9032 | 9033 | 9034 | 9035 | 9036 | 9037 | 9038 | 9039 | 9040 | 9041 | 9042 | 9043 | 9044 | 9045 | 9046 | 9047 | 9048 | 9049 | 9050 | 9051 | 9052 | 9053 | 9054 | 9055 |
|----------|------|------|------|------|------|------|------|------|------|------|------|------|------|------|------|------|------|------|------|------|------|------|------|------|
| 1a       | A    | C    | T    | C    | T    | C    | C    | A    | G    | G    | T    | G    | A    | A    | A    | T    | C    | A    | A    | T    | A    | G    | G    | G    |
| 1b       | A    | C    | T    | C    | T    | C    | C    | A    | G    | G    | T    | G    | A    | R    | A    | T    | C    | A    | A    | T    | A    | G    | G    | G    |
| 2a       | A    | C    | Y    | C    | T    | C    | M    | C    | C    | A    | C    | G    | A    | A    | C    | T    | G    | A    | C    | G    | C    | G    | G    | G    |
| 2b       | A    | C    | T    | C    | T    | C    | C    | C    | A    | C    | G    | A    | A    | A    | C    | T    | C    | T    | C    | R    | C    | G    | G    | G    |
| 2c       | A    | C    | T    | C    | T    | C    | M    | C    | C    | A    | C    | G    | A    | A    | C    | T    | C    | A    | S    | T    | C    | G    | G    | G    |
| 2j       | A    | C    | T    | C    | T    | C    | C    | Y    | C    | A    | T    | G    | A    | A    | C    | T    | C    | A    | C    | A    | C    | G    | G    | G    |
| 3a       | A    | C    | T    | C    | T    | C    | C    | A    | G    | T    | A    | G    | A    | G    | C    | T    | C    | A    | A    | Y    | A    | G    | G    | G    |
| 4a       | A    | C    | T    | C    | T    | C    | C    | A    | C    | A    | C    | G    | A    | A    | C    | T    | C    | A    | A    | Y    | C    | G    | G    | G    |
| 4d       | A    | C    | T    | C    | T    | C    | C    | A    | C    | A    | C    | G    | A    | A    | C    | T    | C    | A    | A    | C    | C    | G    | G    | G    |
| 4f       | A    | C    | T    | C    | T    | C    | C    | A    | C    | A    | C    | G    | A    | A    | C    | T    | C    | A    | A    | T    | C    | G    | G    | G    |

(5' - 3') (Reverse)

| Subtypes | 9348 | 9347 | 9346 | 9345 | 9344 | 9343 | 9342 | 9341 | 9340 | 9339 | 9338 | 9337 | 9336 | 9335 | 9334 | 9333 | 9332 | 9331 | 9330 | 9329 | 9328 |   |
|----------|------|------|------|------|------|------|------|------|------|------|------|------|------|------|------|------|------|------|------|------|------|---|
| 1a       | C    | C    | C    | C    | T    | G    | C    | A    | G    | C    | A    | A    | G    | C    | A    | G    | G    | A    | G    | T    | A    |   |
| 1b       | C    | C    | C    | C    | T    | A    | C    | R    | G    | A    | A    | A    | G    | T    | A    | G    | G    | A    | G    | T    | A    |   |
| 2a       | C    | C    | C    | C    | T    | A    | C    | R    | R    | A    | A    | A    | G    | T    | A    | G    | G    | A    | G    | T    | A    |   |
| 2b       | C    | Y    | C    | C    | T    | A    | C    | G    | C    | T    | A    | A    | G    | T    | A    | G    | G    | A    | G    | T    | A    |   |
| 2c       | C    | C    | C    | C    | T    | A    | C    | R    | C    | A    | A    | A    | G    | t    | A    | G    | G    | A    | G    | T    | A    |   |
| 2j       | C    | C    | C    | C    | T    | A    | C    | A    | A    | G    | A    | A    | G    | T    | A    | G    | G    | A    | G    | T    | A    |   |
| 3a       | C    | C    | C    | C    | T    | A    | C    | C    | G    | T    | T    | A    | A    | G    | T    | A    | G    | G    | A    | G    | T    | A |
| 4a       | C    | C    | C    | C    | T    | A    | C    | K    | G    | W    | a    | A    | G    | T    | A    | G    | G    | A    | G    | T    | A    |   |
| 4d       | C    | C    | C    | C    | T    | A    | C    | G    | G    | A    | A    | A    | G    | T    | A    | G    | G    | A    | G    | T    | A    |   |
| 4f       | C    | C    | C    | C    | T    | A    | C    | T    | G    | A    | A    | A    | G    | T    | A    | G    | G    | A    | G    | T    | A    |   |

PCR NS5B (5.4)

(5' - 3') (Forward)

| Subtypes | 8018 | 8019 | 8020 | 8021 | 8022 | 8023 | 8024 | 8025 | 8026 | 8027 | 8028 | 8029 | 8030 | 8031 | 8032 | 8033 | 8034 | 8035 | 8036 | 8037 | 8038 | 8039 | 8040 | 8041 | 8042 | 8043 | 8044 | 8045 | 8046 | 8047 | 8048 | 8049 | 8050 | 8051 | 8052 | 8053 |
|----------|------|------|------|------|------|------|------|------|------|------|------|------|------|------|------|------|------|------|------|------|------|------|------|------|------|------|------|------|------|------|------|------|------|------|------|------|
| 1a       |      |      |      |      |      |      |      |      |      |      |      |      |      | G    | T    | T    | T    | T    | C    | T    | G    | C    | G    | T    | T    | C    | A    | G    | C    | C    | T    | G    | A    | G    | A    | A    |
| 1b       |      |      |      |      |      |      |      |      |      |      |      |      |      | G    | T    | T    | T    | T    | C    | T    | G    | Y    | G    | T    | C    | C    | A    | A    | C    | C    | A    | G    | A    | G    | A    | A    |
| 2a       |      |      |      |      |      |      |      |      |      |      |      |      |      | G    | T    | G    | T    | T    | C    | T    | G    | C    | G    | T    | G    | G    | A    | A    | C    | C    | C    |      |      |      |      |      |
| 2b       | G    | G    | C    | C    | A    | A    | A    | A    | A    | T    | G    | A    | G    | G    | T    | G    | T    | T    | C    | T    | G    | T    | R    | T    | T    | G    | A    | T    |      |      |      |      |      |      |      |      |
| 2c       |      |      |      |      |      |      |      |      |      |      |      |      |      | G    | T    | G    | T    | T    | C    | T    | G    | C    | G    | T    | Y    | G    | A    | Y    | C    | C    | C    | R    | C    | C    | A    |      |
| 2j       |      |      |      |      |      |      |      |      |      |      |      |      |      | G    | T    | G    | T    | T    | C    | T    | G    | C    | G    | T    | R    | G    | A    | Y    | C    | C    | C    | G    | C    | C    | A    |      |
| 3a       |      | G    | C    | G    | A    | A    | G    | A    | A    | C    | G    | A    | G    | G    | T    | G    | T    | T    | T    | T    | G    | Y    | G    | T    | G    | G    | A    |      |      |      |      |      |      |      |      |      |
| 4a       |      |      |      |      |      |      |      |      |      |      |      |      |      | G    | T    | Y    | T    | T    | C    | G    | C    | T    | G    | T    | R    | A    | A    | A    | C    | C    | C    | A    | G    | C    | G    | A    |
| 4d       |      |      |      |      |      |      |      |      |      |      |      |      |      | G    | T    | C    | T    | T    | C    | T    | C    | C    | G    | T    | A    | A    | A    | A    | C    | C    | C    | G    | A    | G    | A    | A    |
| 4f       |      |      |      | C    | A    | A    | A    | A    | A    | T    | G    | A    | G    | G    | T    | T    | T    | Y    | T    | C    | T    | C    | T    | G    | T    | A    | A    | A    | C    | C    | C    | C    | G    | A    | G    | A    |

(5' - 3') (Reverse)

| Subtypes | 9348 | 9347 | 9346 | 9345 | 9344 | 9343 | 9342 | 9341 | 9340 | 9339 | 9338 | 9337 | 9336 | 9335 | 9334 | 9333 | 9332 | 9331 | 9330 | 9329 | 9328 |   |
|----------|------|------|------|------|------|------|------|------|------|------|------|------|------|------|------|------|------|------|------|------|------|---|
| 1a       | C    | C    | C    | C    | T    | G    | C    | A    | G    | C    | A    | A    | G    | C    | A    | G    | G    | A    | G    | T    | A    |   |
| 1b       | C    | C    | C    | C    | T    | A    | C    | R    | G    | A    | A    | A    | G    | T    | A    | G    | G    | A    | G    | T    | A    |   |
| 2a       | C    | C    | C    | C    | T    | A    | C    | R    | R    | A    | A    | A    | G    | T    | A    | G    | G    | A    | G    | T    | A    |   |
| 2b       | C    | Y    | C    | C    | T    | A    | C    | G    | C    | T    | A    | A    | G    | T    | A    | G    | G    | A    | G    | T    | A    |   |
| 2c       | C    | C    | C    | C    | T    | A    | C    | R    | C    | A    | A    | A    | G    | t    | A    | G    | G    | A    | G    | T    | A    |   |
| 2j       | C    | C    | C    | C    | T    | A    | C    | A    | A    | G    | A    | A    | G    | T    | A    | G    | G    | A    | G    | T    | A    |   |
| 3a       | C    | C    | C    | C    | T    | A    | C    | C    | G    | T    | T    | A    | A    | G    | T    | A    | G    | G    | A    | G    | T    | A |
| 4a       | C    | C    | C    | C    | T    | A    | C    | K    | G    | W    | a    | A    | G    | T    | A    | G    | G    | A    | G    | T    | A    |   |
| 4d       | C    | C    | C    | C    | T    | A    | C    | G    | G    | A    | A    | A    | G    | T    | A    | G    | G    | A    | G    | T    | A    |   |
| 4f       | C    | C    | C    | C    | T    | A    | C    | T    | G    | A    | A    | A    | G    | T    | A    | G    | G    | A    | G    | T    | A    |   |
