# Supplementary material for: Pipeline for specific subtype amplification and drug resistance detection in hepatitis C virus
Source: PubMed Central journal article supplement (PMC6122477; doi:10.1186/s12879-018-3356-6), 2018-09-03
Supplement: 12879_2018_3356_MOESM8_ESM.pdf [file 12879_2018_3356_MOESM8_ESM.pdf]

**Table S5.** Subtype-specific oligonucleotides designed to sequence the NS5A-coding region.

| Subtype | PCR Name                                 | Sense          | Primer Name                                           | Sequence (5'-3') <sup>a</sup>                                | Position <sup>b</sup> | Tm (°C)   |
|---------|------------------------------------------|----------------|-------------------------------------------------------|--------------------------------------------------------------|-----------------------|-----------|
| 1a      | <b>External oligonucleotides (5'-3')</b> |                |                                                       |                                                              |                       |           |
|         | RT-PCR 2                                 | Fw             | NS5Au1a6234                                           | AGCTCGGAGTGYACCACTCCRT                                       | 6234-6255             | 56.7-60.4 |
|         |                                          | Rv             | NS5Ad1a6879                                           | GGGAGGGATCAGTGAGCATGGA                                       | 6879-6858             | 58.6      |
|         | <b>Internal oligonucleotides (5'-3')</b> |                |                                                       |                                                              |                       |           |
|         | PCR 2.1                                  | Fw             | 13u1a6299                                             | <u>GTTGTAAAACGACGGCCAGTGGTGCTGAG</u><br>CGAYTTTAAAGACCTGGCT  | 6299-6325             | 61.3-62.8 |
|         | PCR 2.1                                  | Rv             | 13d1a6735                                             | <u>CACAGGAAACAGCTATGACCTATGYAGG</u><br>CGACCCCGTCCA          | 6735-6715             | 58.3-60.2 |
|         | PCR 2.2                                  | Fw             | NS5AM13u1a6260                                        | <u>GTTGTAAAACGACGGCCAGTCGGTTCCTG</u><br>GCTAAGGGACAT         | 6260-6280             | 56.3      |
|         | PCR 2.2                                  | Rv             | NS5AM13d1a6799                                        | <u>CACAGGAAACAGCTATGACCTCGTGKAGT</u><br>CCYACTCTGAA YGA      | 6799-6777             | 53.5-58.8 |
| 1b      | <b>External oligonucleotides (5'-3')</b> |                |                                                       |                                                              |                       |           |
|         | RT-PCR 2                                 | Fw             | NS5Au1b6234                                           | AAYGAGGACTGCTCCACGCCAT                                       | 6234-6255             | 56.7-58.6 |
|         |                                          | Rv             | NS5Ad1b6879                                           | GGGAGGGGTTCGGTGAGCAT                                         | 6879-6861             | 57.6      |
|         | <b>Internal oligonucleotides (5'-3')</b> |                |                                                       |                                                              |                       |           |
|         | PCR 2.1                                  | Fw             | 13u1b6299                                             | <u>GTTGTAAAACGACGGCCAGTGGTGTTGAC</u><br>TGAYTTCAAGACCTGGCT   | 6299-6325             | 59.7-61.3 |
|         | PCR 2.1                                  | Rv             | 13d1b6735                                             | <u>CACAGGAAACAGCTATGACCTGTGCARCC</u><br>GYACCCCRCCA          | 6735-6715             | 56.3-62.2 |
|         | PCR 2.2                                  | Fw             | NS5AM13u1b6259                                        | <u>GTTGTAAAACGACGGCCAGTCCGGCTCGT</u><br>GGCTAAGGGA           | 6259-6277             | 57.6      |
|         | PCR 2.2                                  | Rv             | NS5AM13d1b6799                                        | <u>CACAGGAAACAGCTATGACCTGGTTGAGC</u><br>CCGACCTGGAATGT       | 6799-6777             | 58.8      |
| 2a      | <b>External oligonucleotides (5'-3')</b> |                |                                                       |                                                              |                       |           |
|         | RT-PCR 2                                 | Fw             | NS5Au2a6234                                           | ACTGAGGACTGCCCATCCCAT                                        | 6234-6255             | 58.6      |
|         |                                          | Rv             | NS5Ad2a6880                                           | TGGGAYGGATCTGTTAGCATGGA                                      | 6880-6858             | 55.3-57.1 |
|         | <b>Internal oligonucleotides (5'-3')</b> |                |                                                       |                                                              |                       |           |
|         | PCR 2.1                                  | Fw             | 13u2a6299                                             | <u>GTTGTAAAACGACGGCCAGTCATCCTRAC</u><br>AGACTTYAAAAAYTGGCT   | 6299-6325             | 52.1-58.2 |
|         | PCR 2.1                                  | Rv             | 13d2a6735                                             | <u>CACAGGAAACAGCTATGACCTRTGGATYT</u><br>GCACTCCGTCCA         | 6735-6715             | 52.4-56.3 |
|         | PCR 2.2                                  | Fw             | NS5AM13u2a6260                                        | <u>GTTGTAAAACGACGGCCAGTCGGMTCVT</u><br>GGCTCCGCGAYGT         | 6260-6280             | 58.3-64.1 |
|         | PCR 2.2                                  | Rv             | NS5AM13d2a6793                                        | <u>CACAGGAAACAGCTATGACCAGCCCAAC</u><br>GCWRAACGAGACCTC       | 6793-6771             | 58.8-60.6 |
| 2b      | <b>External oligonucleotides (5'-3')</b> |                |                                                       |                                                              |                       |           |
|         | RT-PCR 2                                 | Fw             | NS5Au2b6230                                           | GATCACTGAAGATTGCCAGTCCCAT                                    | 6230-6255             | 59.5      |
|         |                                          | Rv             | NS5Ad2b6879                                           | GGGACGGGTCTGTCAACATGGA                                       | 6879-6858             | 58.6      |
|         | <b>Internal oligonucleotides (5'-3')</b> |                |                                                       |                                                              |                       |           |
|         | PCR 2.1                                  | Fw             | 13u2b6299                                             | <u>GTTGTAAAACGACGGCCAGTCATYCTCAC</u><br>AGACTTTAAGA AACTGGCT | 6299-6325             | 56.7-58.2 |
|         | PCR 2.1                                  | Rv             | 13d2b6735                                             | <u>CACAGGAAACAGCTATGACCGGTGTATYT</u><br>GCACCCCGTCCA         | 6735-6715             | 56.3-58.3 |
|         | PCR 2.2                                  | Fw             | NS5AM13u2b6260                                        | <u>GTTGTAAAACGACGGCCAGTGGGGTCTTG</u><br>GCTCCRGA             | 6260-6277             | 54.9-57.2 |
|         | PCR 2.2                                  | Rv             | NS5AM13d2b6799                                        | <u>CACAGGAAACAGCTATGACCGAATTGAG</u><br>GCCYACRGTGAACGT       | 6799-6777             | 55.3-58.8 |
| 2c      | <b>External oligonucleotides (5'-3')</b> |                |                                                       |                                                              |                       |           |
|         | RT-PCR 2                                 | Fw             | NS5Au2c6237                                           | GARGAYTGCCCYGTCCCT                                           | 6237-6255             | 53.2-59.7 |
|         |                                          | Rv             | NS5Ad2c6882                                           | TGTGGGAYGGGTCYGTTCAT                                         | 6882-6861             | 54.8-58.6 |
|         | <b>Internal oligonucleotides (5'-3')</b> |                |                                                       |                                                              |                       |           |
|         | PCR 2.1                                  | Fw             | 13u2c6299                                             | <u>GTTGTAAAACGACGGCCAGTRATCCTGAC</u><br>AGACTTYAAGARTTGGCT   | 6299-6325             | 55.2-59.7 |
|         | PCR 2.1                                  | Rv             | 13d2c6735                                             | <u>CACAGGAAACAGCTATGACCGATGGATYT</u><br>GRACYCCGTCCA         | 6735-6715             | 52.4-58.3 |
| PCR 2.2 | Fw                                       | NS5AM13u2c6256 | <u>GTTGTAAAACGACGGCCAGTGCTCYRGCT</u><br>CATGGCTYCGAGA | 6256-6277                                                    | 56.7-62.3             |           |

|         |                                          |                |                                                            |                                                            |           |           |  |
|---------|------------------------------------------|----------------|------------------------------------------------------------|------------------------------------------------------------|-----------|-----------|--|
|         | PCR 2.2                                  | Rv             | NS5AM13d2c6799                                             | <u>CACAGGAAACAGCTATGACCGAGTTGAG</u><br>MCCCACGCWGAACGA     | 6799-6777 | 58.8-60.6 |  |
| 2j      | <b>External oligonucleotides (5'-3')</b> |                |                                                            |                                                            |           |           |  |
|         | RT-PCR 2                                 | Fw             | NS5Au2j6229                                                | GGATCACTGAGGACTGYCCCGT                                     | 6229-6250 | 58.6-60.4 |  |
|         |                                          | Rv             | NS5Ad2j6878                                                | GGAYGGGTCCGTCAGCATGGA                                      | 6878-6858 | 58.3-60.2 |  |
|         | <b>Internal oligonucleotides (5'-3')</b> |                |                                                            |                                                            |           |           |  |
|         | PCR 2.1                                  | Fw             | 13u2j6299                                                  | <u>GTTGTA AACGACGGCCAGTCATCTTGAC</u><br>TGACTTYAARAAYTGGCT | 6299-6325 | 53.7-58.2 |  |
|         | PCR 2.1                                  | Rv             | 13d2j6735                                                  | <u>CACAGGAAACAGCTATGACCGRTGGATCT</u><br>GYACCCCRTPCCA      | 6735-6715 | 54.4-60.2 |  |
|         | PCR 2.2                                  | Fw             | NS5AM13u2j6261                                             | <u>GTTGTA AACGACGGCCAGTGGCTCTTGG</u><br>CTTCGCGACATAT      | 6261-6282 | 56.7      |  |
| PCR 2.2 | Rv                                       | NS5AM13d2j6799 | <u>CACAGGAAACAGCTATGACCGAGTTGAG</u><br>GCCACGCTAAACGA      | 6799-6777                                                  | 58.8      |           |  |
| 3a      | <b>External oligonucleotides (5'-3')</b> |                |                                                            |                                                            |           |           |  |
|         | RT-PCR 2                                 | Fw             | NS5Au3a6230                                                | GATCAATGAAGACTACCCAAGYCCCTT                                | 6230-6255 | 56.4-58   |  |
|         |                                          | Rv             | NS5Ad3a6874                                                | GGGTCTCTCAACATCGAGGTCA                                     | 6874-6853 | 56.7      |  |
|         | <b>Internal oligonucleotides (5'-3')</b> |                |                                                            |                                                            |           |           |  |
|         | PCR 2.1                                  | Fw             | 13u3a6299                                                  | <u>GTTGTA AACGACGGCCAGTGGTYTGTC</u><br>YGACTTCAAGACATGGCT  | 6299-6325 | 59.7-62.8 |  |
|         | PCR 2.1                                  | Rv             | 13d3a6735                                                  | <u>CACAGGAAACAGCTATGACCGGTGGAGT</u><br>CTCACCCRTCCA        | 6735-6715 | 58.3-60.2 |  |
|         | PCR 2.2                                  | Fw             | NS5AM13u3a6260                                             | <u>GTTGTA AACGACGGCCAGTCGGYGATTG</u><br>GCTGCGTACCAT       | 6260-6280 | 56.3-58.3 |  |
| PCR 2.2 | Rv                                       | NS5AM13d3a6799 | <u>CACAGGAAACAGCTATGACCGAATTCAW</u><br>CCCTACCRGTGAAAGTGAT | 6799-6774                                                  | 54.8-56.4 |           |  |
| 4a      | <b>External oligonucleotides (5'-3')</b> |                |                                                            |                                                            |           |           |  |
|         | RT-PCR 2                                 | Fw             | NS5Au4a6230                                                | GATCAATGAAGATTGYTCCACYCCAT                                 | 6230-6255 | 54.8-58   |  |
|         |                                          | Rv             | NS5Ad4a6879                                                | GTGATGGGTCTGTCARCATGGA                                     | 6879-6858 | 54.8-56.7 |  |
|         | <b>Internal oligonucleotides (5'-3')</b> |                |                                                            |                                                            |           |           |  |
|         | PCR 2.1                                  | Fw             | 13u4a6299                                                  | <u>GTTGTA AACGACGGCCAGTCGTGCTGAG</u><br>TGACTTCAAGACGTGGCT | 6299-6325 | 62.8      |  |
|         | PCR 2.1                                  | Rv             | 13d4a6735                                                  | <u>CACAGGAAACAGCTATGACCGGTGTAGY</u><br>CTGAYGCCGTCYA       | 6735-6715 | 54.4-60.2 |  |
|         | PCR 2.2                                  | Fw             | NS5AM13u4a6260                                             | <u>GTTGTA AACGACGGCCAGTCGAATCTTG</u><br>GCTRTGGGAGGT       | 6260-6280 | 54.4-56.3 |  |
| PCR 2.2 | Rv                                       | NS5AM13d4a6799 | <u>CACAGGAAACAGCTATGACCGAATTGAGT</u><br>CCTACYGAGAACGA     | 6799-6777                                                  | 53.5-55.3 |           |  |
| 4d      | <b>External oligonucleotides (5'-3')</b> |                |                                                            |                                                            |           |           |  |
|         | RT-PCR 2                                 | Fw             | NS5Au4d6234                                                | AACGAGGACTGCTCTACTCCTT                                     | 6234-6255 | 54.8      |  |
|         |                                          | Rv             | NS5Ad4d6879                                                | GAGATGGATCTGTCAGCATAGA                                     | 6879-6858 | 53        |  |
|         | <b>Internal oligonucleotides (5'-3')</b> |                |                                                            |                                                            |           |           |  |
|         | PCR 2.1                                  | Fw             | 13u4d6299                                                  | <u>GTTGTA AACGACGGCCAGTCGTACTGAG</u><br>TGACTTTAAACGTGGCT  | 6299-6325 | 58.2      |  |
|         | PCR 2.1                                  | Rv             | 13d4d6735                                                  | <u>CACAGGAAACAGCTATGACCGATGGAGC</u><br>CTGACGCCATCCA       | 6735-6715 | 58.3      |  |
|         | PCR 2.2                                  | Fw             | NS5AM13u4d6256                                             | <u>GTTGTA AACGACGGCCAGTGTGATCGCT</u><br>CTTGGTTATGGGAGAT   | 6256-6280 | 57.7      |  |
| PCR 2.2 | Rv                                       | NS5AM13d4d6799 | <u>CACAGGAAACAGCTATGACCGTGTGAGG</u><br>CCCCTGTAAAGGA       | 6799-6777                                                  | 57.1      |           |  |
| 4f      | <b>External oligonucleotides (5'-3')</b> |                |                                                            |                                                            |           |           |  |
|         | RT-PCR 2                                 | Fw             | NS5Au4f6227                                                | GTGGATCAATGAAGACTGYCCYACT                                  | 6227-6251 | 56-59.3   |  |
|         |                                          | Rv             | NS5Ad4f6879                                                | GGGATGGGTCTGTAAGCATGGA                                     | 6879-6858 | 56.7      |  |
|         | <b>Internal oligonucleotides (5'-3')</b> |                |                                                            |                                                            |           |           |  |
|         | PCR 2.1                                  | Fw             | 13u4f6299                                                  | <u>GTTGTA AACGACGGCCAGTCGTAYTGTC</u><br>TGACTTYAAGACYTGGCT | 6299-6325 | 56.7-61.3 |  |
|         | PCR 2.1                                  | Rv             | 13d4f6735                                                  | <u>CACAGGAAACAGCTATGACCGGTGAAKT</u><br>CTRACRCCATCCA       | 6735-6715 | 50.5-56.3 |  |
|         | PCR 2.2                                  | Fw             | NS5AM13u4f6256                                             | <u>GTTGTA AACGACGGCCAGTGTGACTCAT</u><br>CYTGGCTRTGGGA      | 6256-6277 | 54.8-58.6 |  |
| PCR 2.2 | Rv                                       | NS5AM13d4f6798 | <u>CACAGGAAACAGCTATGACCAGTTRAGGC</u><br>CCACGGAGAACGT      | 6798-6777                                                  | 56.7-58.6 |           |  |

<sup>a</sup>The underlined nucleotides indicate universal M13 oligonucleotide

<sup>b</sup>Residue numbering according to the reference strain AF009606
