# Supplementary material for: Pipeline for specific subtype amplification and drug resistance detection in hepatitis C virus
Source: PubMed Central journal article supplement (PMC6122477; doi:10.1186/s12879-018-3356-6), 2018-09-03
Supplement: 12879_2018_3356_MOESM9_ESM.pdf [file 12879_2018_3356_MOESM9_ESM.pdf]

**Table S6.** Subtype-specific oligonucleotides designed to sequence the NS5B-coding region.

| Subtype     | PCR Name                                 | Sense          | Primer Name                                               | Sequence (5'-3') <sup>a</sup>                           | Position <sup>b</sup> | T <sub>m</sub> (°C) |
|-------------|------------------------------------------|----------------|-----------------------------------------------------------|---------------------------------------------------------|-----------------------|---------------------|
| <b>1a</b>   | <b>External oligonucleotides (5'-3')</b> |                |                                                           |                                                         |                       |                     |
|             | RT-PCR 3                                 | Fw             | 5Bu1a7952                                                 | CCACATCAACTCCGTGTGG                                     | 7952-7970             | 53.2                |
|             | RT-PCR 3/4                               | Rv             | NS5Bd1a8648                                               | GGGRGCGGAGTACCTGGT                                      | 8648-8631             | 54.9-57.2           |
|             | RT-PCR 5/4                               | Fw             | NS5Bu1a7977                                               | CTTCTGGAAGACAGTGTAACACCAATA                             | 7977-8003             | 56.7                |
|             | RT-PCR 5                                 | Rv             | NS5Bd1a9372                                               | GGTTGGGGAGGAGGTAGATGCCT                                 | 9372-9350             | 60.6                |
|             | <b>Internal oligonucleotides (5'-3')</b> |                |                                                           |                                                         |                       |                     |
|             | PCR 3.1                                  | Fw             | 13u1a7952                                                 | <u>GTTGTAAAACGACGGCCAGT</u> CCACATCAAC<br>TCCGTGTGG     | 7952-7970             | 53.2                |
|             | PCR 3.1                                  | Rv             | 13d1a8389                                                 | CACAGGAAACAGCTATGACCCCRACATAAA<br>GCCTCTCRGTGAG         | 8389-8367             | 55.3-58.8           |
|             | PCR 3.2                                  | Fw             | 13u1a8142                                                 | <u>GTTGTAAAACGACGGCCAGT</u> AAGCTCCCYC<br>TGGCCGTGATGGG | 8142-8164             | 62.4-64.2           |
|             | PCR 3.2                                  | Rv             | 13d1a8584                                                 | CACAGGAAACAGCTATGACCCCKSACTTT<br>CACAGATAACGAC          | 8584-8562             | 55.3-57.1           |
|             | PCR 5.1                                  | Fw             | 13u1a8494                                                 | <u>GTTGTAAAACGACGGCCAGT</u> AGGCCRRGC<br>AGCCTGTGCGAG   | 8494-8514             | 60.2-64.1           |
|             | PCR 5.1                                  | Rv             | 13d1a8878                                                 | CACAGGAAACAGCTATGACCATCAGTATCA<br>TYCTCGCCA             | 8878-8859             | 49.7-51.8           |
|             | PCR 5.2                                  | Fw             | 13u1a8787                                                 | <u>GTTGTAAAACGACGGCCAGT</u> GCGTGGGAGA<br>CAGCAAGACACT  | 8787-8810             | 60.8                |
|             | PCR 5.2                                  | Rv             | 13d1a9190                                                 | CACAGGAAACAGCTATGACCACTGCCART<br>TGAAGAGGTA             | 9190-9171             | 49.7-51.8           |
| PCR 5.3     | Fw                                       | 13u1a9032      | <u>GTTGTAAAACGACGGCCAGT</u> ACTCTCCAGG<br>TGAATCAATAGG    | 9032-9055                                               | 55.7                  |                     |
| PCR 5.3/5.4 | Rv                                       | NS5BM13d1a9348 | CACAGGAAACAGCTATGACCCCTGCAGC<br>AAGCAGGAGTA               | 9348-9328                                               | 58.3                  |                     |
| PCR 4.1/5.4 | Fw                                       | NS5BM13u1a8031 | <u>GTTGTAAAACGACGGCCAGT</u> GTTTTCTGCG<br>TTCAGCCTGAGAA   | 8031-8053                                               | 55.3                  |                     |
| PCR 4.1     | Rv                                       | NS5BM13d1a8589 | CACAGGAAACAGCTATGACCGGACYCCCKS<br>ACTTTCACAGATA           | 8589-8567                                               | 55.3-58.8             |                     |
| <b>1b</b>   | <b>External oligonucleotides (5'-3')</b> |                |                                                           |                                                         |                       |                     |
|             | RT-PCR 3                                 | Fw             | 5Bu1b7952                                                 | CCACATCCRCTCCGTGTGG                                     | 7952-7970             | 55.4-57.6           |
|             | RT-PCR 3/4                               | Rv             | NS5Bd1b8650                                               | GGGGGGCAGAGTACCTAGT                                     | 8650-8631             | 57.9                |
|             | RT-PCR 5/4                               | Fw             | NS5Bu1b7976                                               | CTTGCTGGAAGACACTGARACACCAATT                            | 7976-8003             | 58.5-59.9           |
|             | RT-PCR 5                                 | Rv             | NS5Bd1b9372                                               | GGTTGGGGAGCAGGTAGATGCCT                                 | 9372-9350             | 60.6                |
|             | <b>Internal oligonucleotides (5'-3')</b> |                |                                                           |                                                         |                       |                     |
|             | PCR 3.1                                  | Fw             | 13u1b7952                                                 | <u>GTTGTAAAACGACGGCCAGT</u> CCACATCCRC<br>TCCGTGTGG     | 7952-7970             | 55.4-57.6           |
|             | PCR 3.1                                  | Rv             | 13d1b8389                                                 | CACAGGAAACAGCTATGACCCCGATRATAA<br>GCCGCTCTGTGAG         | 8389-8367             | 57.1-58.8           |
|             | PCR 3.2                                  | Fw             | 13u1b8142                                                 | <u>GTTGTAAAACGACGGCCAGT</u> ACCCTTCCTC<br>AGGCCGTGATGGG | 8142-8164             | 62.4                |
|             | PCR 3.2                                  | Rv             | 13d1b8584                                                 | CACAGGAAACAGCTATGACCCCGCGCTYT<br>CACAGATAACGAC          | 8584-8562             | 58.8-60.6           |
|             | PCR 5.1                                  | Fw             | 13u1b8494                                                 | <u>GTTGTAAAACGACGGCCAGT</u> AGGCCWCTGC<br>RGCCTGTGCGAG  | 8494-8514             | 60.2-62.2           |
|             | PCR 5.1                                  | Rv             | 13d1b8878                                                 | CACAGGAAACAGCTATGACCATCAGRATCA<br>TCCTTGCCA             | 8878-8859             | 49.7-51.8           |
|             | PCR 5.2                                  | Fw             | 13u1b8787                                                 | <u>GTTGTAAAACGACGGCCAGT</u> GCGTGGGAGA<br>CAGCTAGACACT  | 8787-8810             | 60.8                |
|             | PCR 5.2                                  | Rv             | 13d1b9190                                                 | CACAGGAAACAGCTATGACCACTGCCAGT<br>TGAAGAGGTA             | 9190-9171             | 51.8                |
| PCR 5.3     | Fw                                       | 13u1b9032      | <u>GTTGTAAAACGACGGCCAGT</u> ACTCTCCAGG<br>TGARATCAATAGG   | 9032-9055                                               | 55.7-57.4             |                     |
| PCR 5.3/5.4 | Rv                                       | NS5BM13d1b9348 | CACAGGAAACAGCTATGACCCCTACRGA<br>AAGTAGGAGTA               | 9348-9328                                               | 52.4-54.4             |                     |
| PCR 4.1/5.4 | Fw                                       | NS5BM13u1b8028 | <u>GTTGTAAAACGACGGCCAGT</u> GAGGTTTTCT<br>GYGTCCAACCAGAGA | 8028-8052                                               | 57.7-59.3             |                     |
| PCR 4.1     | Rv                                       | NS5BM13d1b8589 | CACAGGAAACAGCTATGACCGGTTCCCGC                             | 8589-8567                                               |                       |                     |

|             |                                          |                |                                                      |                                                  |           |           |
|-------------|------------------------------------------|----------------|------------------------------------------------------|--------------------------------------------------|-----------|-----------|
|             |                                          |                |                                                      | GCTYTCACAGATA                                    |           | 58.8-60.6 |
| 2a          | <b>External oligonucleotides (5'-3')</b> |                |                                                      |                                                  |           |           |
|             | RT-PCR 3                                 | Fw             | 5Bu2a7952                                            | CCACATCAAGTCCGTGTGG                              | 7952-7970 | 53.2      |
|             | RT-PCR 3/4                               | Rv             | NS5Bd2a8652                                          | CAGGAGGGGCAGARTACCTGGT                           | 8652-8631 | 58.6-60.4 |
|             | RT-PCR 5/4                               | Fw             | NS5Bu2a7977                                          | CTCCTGGAAGACTCACAAACACCAATT                      | 7977-8003 | 58.2      |
|             | RT-PCR 5                                 | Rv             | NS5Bd2a9372                                          | GAGCGGGGAGTAGRAAGAGCCT                           | 9372-9350 | 60.6-62.4 |
|             | <b>Internal oligonucleotides (5'-3')</b> |                |                                                      |                                                  |           |           |
|             | PCR 3.1                                  | Fw             | 13u2a7952                                            | GTTGTAAAACGACGGCCAGTACCACATCAA<br>GTCCGTGTGG     | 7952-7970 | 53.2      |
|             | PCR 3.1                                  | Rv             | 13d2a8389                                            | CACAGGAAACAGCTATGACCCCYACGTAAA<br>GTCTCTCAGTCAG  | 8389-8367 | 55.3-57.1 |
|             | PCR 3.2                                  | Fw             | 13u2a8142                                            | GTTGTAAAACGACGGCCAGTAAGCTTCCTC<br>AGGCGGTGATGGG  | 8142-8164 | 60.6      |
|             | PCR 3.2                                  | Rv             | 13d2a8584                                            | CACAGGAAACAGCTATGACCCCTGGCTTT<br>CTGAGATGACWAC   | 8584-8562 | 57.1      |
|             | PCR 5.1                                  | Fw             | 13u2a8494                                            | GTTGTAAAACGACGGCCAGTAAGCCCTAGC<br>GGCYTGYAAGG    | 8494-8514 | 56.3-60.2 |
|             | PCR 5.1                                  | Rv             | 13d2a8878                                            | CACAGGAAACAGCTATGACCATYAGGACCA<br>TGCGARCCCA     | 8878-8859 | 51.8-5.9  |
|             | PCR 5.2                                  | Fw             | 13u2a8787                                            | GTTGTAAAACGACGGCCAGTGCCTGGGAAA<br>CAGTTAGACACTCC | 8787-8810 | 59.1      |
|             | PCR 5.2                                  | Rv             | 13d2a9190                                            | CACAGGAAACAGCTATGACCACCGCCART<br>TGAAGAGATA      | 9190-9171 | 49.7-51.8 |
| PCR 5.3     | Fw                                       | 13u2a9032      | GTTGTAAAACGACGGCCAGTACYCTCMCCA<br>CGAACTGACGCGG      | 9032-9055                                        | 62.5-65.9 |           |
| PCR 5.3/5.4 | Rv                                       | NS5BM13d2a9348 | CACAGGAAACAGCTATGACCCCTACRRA<br>AAGTAGGAGTA          | 9348-9328                                        | 50.5-54.4 |           |
| PCR 4.1/5.4 | Fw                                       | NS5BM13u2a8028 | GTTGTAAAACGACGGCCAGTGAGGTGTTCT<br>GCGTGGACCC         | 8028-8047                                        | 57.9      |           |
| PCR 4.1     | Rv                                       | NS5BM13d2a8589 | CACAGGAAACAGCTATGACCAGTCCCCTG<br>GCTTCTGAGATG        | 8589-8567                                        | 58.8      |           |
| 2b          | <b>External oligonucleotides (5'-3')</b> |                |                                                      |                                                  |           |           |
|             | RT-PCR 3                                 | Fw             | 5Bu2b7952                                            | CCACATCCGGTCCGTGTGG                              | 7952-7970 | 57.6      |
|             | RT-PCR 3/4                               | Rv             | NS5Bd2b8651                                          | GGGAGGGGCRGAATACCTGGT                            | 8651-8631 | 58.3-60.2 |
|             | RT-PCR 5/4                               | Fw             | NS5Bu2b7977                                          | CTCCTGGAAGACCAACATACYCCAATT                      | 7977-8003 | 58.2-59.7 |
|             | RT-PCR 5                                 | Rv             | NS5Bd2b9372                                          | GAGCGGGGAGTAAAAAGATGCCT                          | 9372-9350 | 57.1      |
|             | <b>Internal oligonucleotides (5'-3')</b> |                |                                                      |                                                  |           |           |
|             | PCR 3.1                                  | Fw             | 13u2b7952                                            | GTTGTAAAACGACGGCCAGTCCACATCCGG<br>TCCGTGTGG      | 7952-7970 | 57.6      |
|             | PCR 3.1                                  | Rv             | 13d2b8389                                            | CACAGGAAACAGCTATGACCCCTACGTARA<br>GTCTCTCAGTGAG  | 8389-8367 | 55.3-57.1 |
|             | PCR 3.2                                  | Fw             | 13u2b8142                                            | GTTGTAAAACGACGGCCAGTAAGCTTCCCA<br>ARGCARTAATGGG  | 8142-8164 | 53.5-57.1 |
|             | PCR 3.2                                  | Rv             | 13d2b8584                                            | CACAGGAAACAGCTATGACCCCTGGCTCT<br>CTGAGATGACRAC   | 8584-8562 | 57.1-58.8 |
|             | PCR 5.1                                  | Fw             | 13u2b8494                                            | GTTGTAAAACGACGGCCAGTAAGCCCTTGC<br>AGCRTGYAARG    | 8494-8514 | 52.4-58.3 |
|             | PCR 5.1                                  | Rv             | 13d2b8878                                            | CACAGGAAACAGCTATGACCATTATGACCA<br>TCCGGACCCA     | 8878-8859 | 51.8      |
|             | PCR 5.2                                  | Fw             | 13u2b8787                                            | GTTGTAAAACGACGGCCAGTGCTTGGGAAA<br>CAGTAAGACACTCC | 8787-8810 | 57.4      |
|             | PCR 5.2                                  | Rv             | 13d2b9190                                            | CACAGGAAACAGCTATGACCACCGCCAGT<br>TGAAGAGGTA      | 9190-9171 | 53.8      |
| PCR 5.3     | Fw                                       | 13u2b9032      | GTTGTAAAACGACGGCCAGTACTCTCCCA<br>CGAACTCTCRGGG       | 9032-9055                                        | 62.5-64.2 |           |
| PCR 5.3/5.4 | Rv                                       | NS5BM13d2b9348 | CACAGGAAACAGCTATGACCYCCTACGCT<br>AAGTAGGAGTA         | 9348-9328                                        | 52.4-54.4 |           |
| PCR 4.1/5.4 | Fw                                       | NS5BM13u2b8018 | GTTGTAAAACGACGGCCAGTGGCCAAAAAT<br>GAGGTGTTCTGTGTTGAT | 8018-8045                                        | 58.5      |           |
| PCR 4.1     | Rv                                       | NS5BM13d2b8589 | CACAGGAAACAGCTATGACCCTTRCCTTG<br>GCTCTCTGAGATG       | 8589-8567                                        | 57.1-58.8 |           |

|             |                                          |                |                                                  |                                                  |           |           |
|-------------|------------------------------------------|----------------|--------------------------------------------------|--------------------------------------------------|-----------|-----------|
| 2c          | <b>External oligonucleotides (5'-3')</b> |                |                                                  |                                                  |           |           |
|             | RT-PCR 3                                 | Fw             | 5Bu2c7952                                        | CCACATCAAGTCCGTGTGG                              | 7952-7970 | 53.2      |
|             | RT-PCR 3/4                               | Rv             | NS5Bd2c8650                                      | GGRGGGCGGAGTACCTGGT                              | 8650-8631 | 57.9-62   |
|             | RT-PCR 5/4                               | Fw             | NS5Bu2c7977                                      | CTCCTGGAAGACCAITGYTCACCAATT                      | 7977-8003 | 58.2-61.3 |
|             | RT-PCR 5                                 | Rv             | NS5Bd2c9372                                      | GAGCGGGGAGTARGAAGATGCCT                          | 9372-9350 | 58.8-60.6 |
|             | <b>Internal oligonucleotides (5'-3')</b> |                |                                                  |                                                  |           |           |
|             | PCR 3.1                                  | Fw             | 13u2c7952                                        | GTTGTAAAACGACGGCCAGTCCACATCAAG<br>TCCGTGTGG      | 7952-7970 | 53.2      |
|             | PCR 3.1                                  | Rv             | 13d2c8389                                        | CACAGGAAACAGCTATGACCCCYACGTAHA<br>GTCTCTCAGTCAG  | 8389-8367 | 55.3-58.8 |
|             | PCR 3.2                                  | Fw             | 13u2c8142                                        | GTTGTAAAACGACGGCCAGTAAGCTTCCCCG<br>TCGCRGTGATGGG | 8142-8164 | 60.6-62.4 |
|             | PCR 3.2                                  | Rv             | 13d2c8584                                        | CACAGGAAACAGCTATGACCCCYTGACTYT<br>CTGAGATGACGAC  | 8584-8562 | 55.3-58.8 |
|             | PCR 5.1                                  | Fw             | 13u2c8494                                        | GTTGTAAAACGACGGCCAGTARGCCAGGGC<br>GGCBTGYAACG    | 8494-8514 | 58.3-64.1 |
|             | PCR 5.1                                  | Rv             | 13d2c8878                                        | CACAGGAAACAGCTATGACCATYAGGACCA<br>TRCGCRCCCA     | 8878-8859 | 51.8-57.9 |
|             | PCR 5.2                                  | Fw             | 13u2c8787                                        | GTTGTAAAACGACGGCCAGTGCCTGGGAGA<br>CAGCAAGACACTCC | 8787-8810 | 62.5      |
|             | PCR 5.2                                  | Rv             | 13d2c9190                                        | CACAGGAAACAGCTATGACCACAGCCCAGT<br>TGAAGAGGTA     | 9190-9171 | 51.8      |
| PCR 5.3     | Fw                                       | 13u2c9032      | GTTGTAAAACGACGGCCAGTACTCTCMCCA<br>CGAACTCASTCGGG | 9032-9055                                        | 60.8-62.5 |           |
| PCR 5.3/5.4 | Rv                                       | NS5BM13d2c9348 | CACAGGAAACAGCTATGACCCCCCTACRCA<br>AAGTAGGAGTA    | 9348-9328                                        | 52.4-54.4 |           |
| PCR 4.1/5.4 | Fw                                       | NS5BM13u2c8031 | GTTGTAAAACGACGGCCAGTGTGTTCTGCG<br>TYGAYCCCRCRA   | 8031-8052                                        | 56.7-62.3 |           |
| PCR 4.1     | Rv                                       | NS5BM13d2c8586 | CACAGGAAACAGCTATGACCCCCCYTGACT<br>YTCTGAGATGA    | 8586-8566                                        | 52.4-56.3 |           |
| 2j          | <b>External oligonucleotides (5'-3')</b> |                |                                                  |                                                  |           |           |
|             | RT-PCR 3                                 | Fw             | 5Bu2j7952                                        | CCACATCMAGTCCGTGTGG                              | 7952-7970 | 53.2-55.4 |
|             | RT-PCR 3/4                               | Rv             | NS5Bd2j8649                                      | GRGGGGCGGAGTACCTGGT                              | 8649-8631 | 57.6-59.7 |
|             | RT-PCR 5/4                               | Fw             | NS5Bu2j7977                                      | CTTTTGGAGGACTCARACACACCAATT                      | 7977-8003 | 56.7-58.2 |
|             | RT-PCR 5                                 | Rv             | NS5Bd2j9372                                      | GAGCGGGGAGTAAAAAGATGCCT                          | 9372-9350 | 57.1      |
|             | <b>Internal oligonucleotides (5'-3')</b> |                |                                                  |                                                  |           |           |
|             | PCR 3.1                                  | Fw             | 13u2j7952                                        | GTTGTAAAACGACGGCCAGTCCACATCMAG<br>TCCGTGTGG      | 7952-7970 | 53.2-55.4 |
|             | PCR 3.1                                  | Rv             | 13d2j8389                                        | CACAGGAAACAGCTATGACCCCCACGTARA<br>GTCTCTCAGTGAG  | 8389-8367 | 57.1-58.8 |
|             | PCR 3.2                                  | Fw             | 13u2j8142                                        | GTTGTAAAACGACGGCCAGTAAACTYCCCC<br>AGGCRGTGATGGG  | 8142-8164 | 58.8-62.4 |
|             | PCR 3.2                                  | Rv             | 13d2j8584                                        | CACAGGAAACAGCTATGACCCCTGACTCT<br>CTGAGATGACRAC   | 8584-8562 | 57.1-58.8 |
|             | PCR 5.1                                  | Fw             | 13u2j8494                                        | GTTGTAAAACGACGGCCAGTAGGCCYTAGC<br>RGCCTGTAAGG    | 8494-8514 | 56.3-60.2 |
|             | PCR 5.1                                  | Rv             | 13d2j8878                                        | CACAGGAAACAGCTATGACCATTAAGACCA<br>TACGGGCCCA     | 8878-8859 | 51.8      |
|             | PCR 5.2                                  | Fw             | 13u2j8787                                        | GTTGTAAAACGACGGCCAGTGCCTGGGAAA<br>CTGYAAARCACTCY | 8787-8810 | 55.7-60.8 |
|             | PCR 5.2                                  | Rv             | 13d2j9190                                        | CACAGGAAACAGCTATGACCACTGCCAGT<br>TRAAGAGGTA      | 9190-9171 | 49.7-51.8 |
| PCR 5.3     | Fw                                       | 13u2j9032      | GTTGTAAAACGACGGCCAGTACTCTCCYCA<br>TGAACTCACACGGG | 9032-9055                                        | 59.1-60.8 |           |
| PCR 5.3/5.4 | Rv                                       | NS5BM13d2j9348 | CACAGGAAACAGCTATGACCCCCCTACAAG<br>AAGTAGGAGTA    | 9348-9328                                        | 52.4      |           |
| PCR 4.1/5.4 | Fw                                       | NS5BM13u2j8031 | GTTGTAAAACGACGGCCAGTGTGTTCTGCG<br>TRGAYCCCRCRA   | 8031-8052                                        | 58.6-62.3 |           |
| PCR 4.1     | Rv                                       | NS5BM13d2j8589 | CACAGGAAACAGCTATGACCCAGCYCCCTG<br>ACTCTCTGAGATG  | 8589-8567                                        | 58.8-60.6 |           |

|             |                                          |                |                                                           |                                                          |           |           |
|-------------|------------------------------------------|----------------|-----------------------------------------------------------|----------------------------------------------------------|-----------|-----------|
| <b>3a</b>   | <b>External oligonucleotides (5'-3')</b> |                |                                                           |                                                          |           |           |
|             | RT-PCR 3                                 | Fw             | 5Bu3a7952                                                 | CCAGATCCGCTCCGTCTGG                                      | 7952-7970 | 57.6      |
|             | RT-PCR 3/4                               | Rv             | NS5Bd3a8652                                               | CGGGTGGAGCAGAATACCTGGT                                   | 8652-8631 | 58.6      |
|             | RT-PCR 5/4                               | Fw             | NS5Bu3a7976                                               | CTTGCTGGAAGACACYACAACCTCCAATT                            | 7976-8003 | 58.5-59.9 |
|             | RT-PCR 5                                 | Rv             | NS5Bd3a9372                                               | GWGCTGGCAGGAGATAGATGCCT                                  | 9372-9350 | 58.8      |
|             | <b>Internal oligonucleotides (5'-3')</b> |                |                                                           |                                                          |           |           |
|             | PCR 3.1                                  | Fw             | 13u3a7952                                                 | <u>GTTGTAAAACGACGGCCAGTCCAGATCCGC</u><br>TCCGTCTGG       | 7952-7970 | 57.6      |
|             | PCR 3.1                                  | Rv             | 13d3a8389                                                 | <u>CACAGGAAACAGCTATGACCCCGCAGTAAA</u><br>GCCGCTCCGTGAG   | 8389-8367 | 62.4      |
|             | PCR 3.2                                  | Fw             | 13u3a8142                                                 | <u>GTTGTAAAACGACGGCCAGTAAGTTGTCAA</u><br>TTGMGACGATGGG   | 8142-8164 | 53.5-55.3 |
|             | PCR 3.2                                  | Rv             | 13d3a8584                                                 | <u>CACAGGAAACAGCTATGACCCCATCACTCT</u><br>CRGCCACACRAC    | 8584-8562 | 58.8-62.4 |
|             | PCR 5.1                                  | Fw             | 13u3a8494                                                 | <u>GTTGTAAAACGACGGCCAGTAGGCCACAGC</u><br>GGCYGCRARGG     | 8494-8514 | 60.2-66.1 |
|             | PCR 5.1                                  | Rv             | 13d3a8878                                                 | <u>CACAGGAAACAGCTATGACCATCATYACCA</u><br>TGCGCACCCA      | 8878-8859 | 51.8-53.8 |
|             | PCR 5.2                                  | Fw             | 13u3a8787                                                 | <u>GTTGTAAAACGACGGCCAGTGCTTGGGARA</u><br>CAGCTCGTCACACT  | 8787-8810 | 59.1-60.8 |
|             | PCR 5.2                                  | Rv             | 13d3a9190                                                 | <u>CACAGGAAACAGCTATGACCACCGCCCAAT</u><br>TRAAGAGRTA      | 9190-9171 | 47.7-51.8 |
| PCR 5.3     | Fw                                       | 13u3a9032      | <u>GTTGTAAAACGACGGCCAGTACTCTCCAGT</u><br>AGAGCTCAAYAGGG   | 9032-9055                                                | 57.4-59.1 |           |
| PCR 5.3/5.4 | Rv                                       | NS5BM13d3a9348 | <u>CACAGGAAACAGCTATGACCCCCCTACCGT</u><br>TAGTAGGAGTA      | 9348-9328                                                | 54.4      |           |
| PCR 4.1/5.4 | Fw                                       | NS5BM13u3a8019 | <u>GTTGTAAAACGACGGCCAGTGCGAAGAACG</u><br>AGGTGTTTTGYGTGGA | 8019-8044                                                | 59.5-61.1 |           |
| PCR 4.1     | Rv                                       | NS5BM13d3a8586 | <u>CACAGGAAACAGCTATGACCCGCCATCACT</u><br>CTCRGCGACCA      | 8586-8566                                                | 58.3-60.2 |           |
| <b>4a</b>   | <b>External oligonucleotides (5'-3')</b> |                |                                                           |                                                          |           |           |
|             | RT-PCR 3                                 | Fw             | 5Bu4a7952                                                 | CCACATCARCTCCGTGTGG                                      | 7952-7970 | 53.2-55.4 |
|             | RT-PCR 3/4                               | Rv             | NS5Bd4a8650                                               | GGGGGAGCCGAGTAYCTCGT                                     | 8650-8631 | 57.9-60   |
|             | RT-PCR 5/4                               | Fw             | NS5Bu4a7976                                               | CTTGCTGGAAGACAACAATACCCCAATA                             | 7976-8003 | 58.5      |
|             | RT-PCR 5                                 | Rv             | NS5Bd4a9372                                               | GAGCAGGCAGCAGGTAGATGCCT                                  | 9372-9350 | 60.6      |
|             | <b>Internal oligonucleotides (5'-3')</b> |                |                                                           |                                                          |           |           |
|             | PCR 3.1                                  | Fw             | 13u4a7952                                                 | <u>GTTGTAAAACGACGGCCAGTCCACATCARC</u><br>TCCGTGTGG       | 7952-7970 | 53.2-55.4 |
|             | PCR 3.1                                  | Rv             | 13d4a8389                                                 | <u>CACAGGAAACAGCTATGACCCCCACRTAGA</u><br>GTCTYCTGTGAG    | 8389-8367 | 55.3-58.8 |
|             | PCR 3.2                                  | Fw             | 13u4a8142                                                 | <u>GTTGTAAAACGACGGCCAGTMAACTACCTR</u><br>AGGCCGTGATGGG   | 8142-8164 | 57.1-60.6 |
|             | PCR 3.2                                  | Rv             | 13d4a8584                                                 | <u>CACAGGAAACAGCTATGACCCCGTCGCTCT</u><br>CAGCGATRACGAC   | 8584-8562 | 60.6-62.4 |
|             | PCR 5.1                                  | Fw             | 13u4a8494                                                 | <u>GTTGTAAAACGACGGCCAGTAAGCCACRGC</u><br>CGCTATYARAG     | 8494-8514 | 52.4-58.3 |
|             | PCR 5.1                                  | Rv             | 13d4a8878                                                 | <u>CACAGGAAACAGCTATGACCATCARTAYCA</u><br>TRCGCACCCA      | 8878-8859 | 47.7-53.8 |
|             | PCR 5.2                                  | Fw             | 13u4a8787                                                 | <u>GTTGTAAAACGACGGCCAGTGCRITGGGAGA</u><br>CAGTCCGACACACT | 8787-8810 | 60.8-62.5 |
|             | PCR 5.2                                  | Rv             | 13d4a9190                                                 | <u>CACAGGAAACAGCTATGACCACCGCCCACT</u><br>TAAAGAGGTA      | 9190-9171 | 51.8      |
| PCR 5.3     | Fw                                       | 13u4a9032      | <u>GTTGTAAAACGACGGCCAGTACTCTCCACA</u><br>CGAACTCAAYCGGG   | 9032-9055                                                | 59.1-60.8 |           |
| PCR 5.3/5.4 | Rv                                       | NS5BM13d4a9348 | <u>CACAGGAAACAGCTATGACCCCCCTACKG</u><br>WAAGTAGGAGTA      | 9348-9328                                                | 52.4-54.4 |           |
| PCR 4.1/5.4 | Fw                                       | NS5BM13u4a8031 | <u>GTTGTAAAACGACGGCCAGTGTYTTCGCTG</u><br>TRAACCCAGCGA     | 8031-8052                                                | 54.8-58.6 |           |
| PCR 4.1     | Rv                                       | NS5BM13d4a8586 | <u>CACAGGAAACAGCTATGACCCGCCGTCGCT</u><br>CTCAGCGAT        | 8586-8568                                                | 57.6      |           |

|             |                                          |                |                                                      |                                                 |           |           |
|-------------|------------------------------------------|----------------|------------------------------------------------------|-------------------------------------------------|-----------|-----------|
| <b>4d</b>   | <b>External oligonucleotides (5'-3')</b> |                |                                                      |                                                 |           |           |
|             | RT-PCR 3                                 | Fw             | 5Bu4d7952                                            | CCACATCAACTCCGTGTGG                             | 7952-7970 | 53.2      |
|             | RT-PCR 3/4                               | Rv             | NS5Bd4d8649                                          | GGGGGGCTGAGTACCTCGT                             | 8649-8631 | 57.6      |
|             | RT-PCR 5/4                               | Fw             | NS5Bu4d7982                                          | GGAAGACAACACTACCCCATC                           | 7982-8003 | 56.7      |
|             | RT-PCR 5                                 | Rv             | NS5Bd4d9372                                          | GAGCRGGCAGCAGGTAGATGCCT                         | 9372-9350 | 60.6-62.4 |
|             | <b>Internal oligonucleotides (5'-3')</b> |                |                                                      |                                                 |           |           |
|             | PCR 3.1                                  | Fw             | 13u4d7952                                            | GTTGTAAAACGACGGCCAGTCCACATCAAC<br>TCCGTGTGG     | 7952-7970 | 53.2      |
|             | PCR 3.1                                  | Rv             | 13d4d8389                                            | CACAGGAAACAGCTATGACCCACGTTAG<br>GTCTCTGTGAG     | 8389-8367 | 58.8      |
|             | PCR 3.2                                  | Fw             | 13u4d8142                                            | GTTGTAAAACGACGGCCAGTCAACTTTCTC<br>TGGCCGTGATGGG | 8142-8164 | 58.8      |
|             | PCR 3.2                                  | Rv             | 13d4d8584                                            | CACAGGAAACAGCTATGACCCATCGCTTT<br>CAGCGATAACGAC  | 8584-8562 | 57.1      |
|             | PCR 5.1                                  | Fw             | 13u4d8494                                            | GTTGTAAAACGACGGCCAGTAGGCCAGCGC<br>AGCCATCAGGG   | 8494-8514 | 62.2      |
|             | PCR 5.1                                  | Rv             | 13d4d8878                                            | CACAGGAAACAGCTATGACCATCAAAACCA<br>TGCGCACCA     | 8878-8859 | 51.8      |
|             | PCR 5.2                                  | Fw             | 13u4d8787                                            | GTTGTAAAACGACGGCCAGTGCCTGGGAGA<br>CAGCTCGACACT  | 8787-8810 | 62.5      |
|             | PCR 5.2                                  | Rv             | 13d4d9190                                            | CACAGGAAACAGCTATGACCACCGCCAGT<br>TAAAGAGTA      | 9190-9171 | 51.8      |
| PCR 5.3     | Fw                                       | 13u4d9032      | GTTGTAAAACGACGGCCAGTACTCTCCACA<br>CGAACTCAACCGG      | 9032-9055                                       | 60.8      |           |
| PCR 5.3/5.4 | Rv                                       | NS5BM13d4d9348 | CACAGGAAACAGCTATGACCCCTACGGA<br>AAGTAGGAGTA          | 9348-9328                                       | 54.4      |           |
| PCR 4.1/5.4 | Fw                                       | NS5BM13u4d8030 | GTTGTAAAACGACGGCCAGTGGTCTTCTCC<br>GTAACCGGAGA        | 8030-8052                                       | 57.1      |           |
| PCR 4.1     | Rv                                       | NS5BM13d4d8589 | CACAGGAAACAGCTATGACCCACGCCATC<br>GCTTTCAGCGATA       | 8589-8567                                       | 58.8      |           |
| <b>4f</b>   | <b>External oligonucleotides (5'-3')</b> |                |                                                      |                                                 |           |           |
|             | RT-PCR 3                                 | Fw             | 5Bu4f7952                                            | CCACATCAACTCCGTGTGG                             | 7952-7970 | 53.2      |
|             | RT-PCR 3/4                               | Rv             | NS5Bd4f8650                                          | GGGGGAGCCGARTACCTCGT                            | 8650-8631 | 57.9-60   |
|             | RT-PCR 5/4                               | Fw             | NS5Bu4f7976                                          | CTTGCTGGAAGACAACAACCCCTATT                      | 7976-8003 | 59.9      |
|             | RT-PCR 5                                 | Rv             | NS5Bd4f9372                                          | GAGCAGGCAGCARRTAGATGCCT                         | 9372-9350 | 57.1-60.6 |
|             | <b>Internal oligonucleotides (5'-3')</b> |                |                                                      |                                                 |           |           |
|             | PCR 3.1                                  | Fw             | 13u4f7952                                            | GTTGTAAAACGACGGCCAGTCCACATCAAC<br>TCCGTGTGG     | 7952-7970 | 53.2      |
|             | PCR 3.1                                  | Rv             | 13d4f8389                                            | CACAGGAAACAGCTATGACCCACRTAG<br>GTCTYTCAGTGAG    | 8389-8367 | 55.3-58.8 |
|             | PCR 3.2                                  | Fw             | 13u4f8142                                            | GTTGTAAAACGACGGCCAGTAAMCTCYCTG<br>AGGCCGTGATGGG | 8142-8164 | 58.8-62.4 |
|             | PCR 3.2                                  | Rv             | 13d4f8584                                            | CACAGGAAACAGCTATGACCCATCGCTTT<br>CGGYGATAACGAC  | 8584-8562 | 57.1-58.8 |
|             | PCR 5.1                                  | Fw             | 13u4f8494                                            | GTTGTAAAACGACGGCCAGTAGGCYACRGC<br>GGCCGCYAAAAG  | 8494-8514 | 58.3-64.1 |
|             | PCR 5.1                                  | Rv             | 13d4f8878                                            | CACAGGAAACAGCTATGACCATCAATATCA<br>TGCGCACCA     | 8878-8859 | 49.7      |
|             | PCR 5.2                                  | Fw             | 13u4f8787                                            | GTTGTAAAACGACGGCCAGTGCCTGGGAGA<br>CAGCCAGACACT  | 8787-8810 | 62.5      |
|             | PCR 5.2                                  | Rv             | 13d4f9190                                            | CACAGGAAACAGCTATGACCRYCGCCAGT<br>TRAAGAGTA      | 9190-9171 | 49.7-55.9 |
| PCR 5.3     | Fw                                       | 13u4f9032      | GTTGTAAAACGACGGCCAGTACTCTCCACA<br>CGAACTCAATCGG      | 9032-9055                                       | 59.1      |           |
| PCR 5.3/5.4 | Rv                                       | NS5BM13d4f9348 | CACAGGAAACAGCTATGACCCCTACTGA<br>AAGTAGGAGTA          | 9348-9328                                       | 52.4      |           |
| PCR 4.1/5.4 | Fw                                       | NS5BM13u4f8021 | GTTGTAAAACGACGGCCAGTCAAAAATGAG<br>GTTTTYTCTGYAACCCCA | 8021-8050                                       | 57.5-60.3 |           |
| PCR 4.1     | Rv                                       | NS5BM13d4f8589 | CACAGGAAACAGCTATGACCCGACACCATC<br>GCTTTCGGYGATA      | 8589-8567                                       | 57.1-58.8 |           |

<sup>a</sup>The underlined nucleotides indicate universal M13 oligonucleotide

<sup>b</sup>Residue numbering according to the reference strain AF009606
