# Supplementary material for: Pipeline for specific subtype amplification and drug resistance detection in hepatitis C virus
Source: PubMed Central journal article supplement (PMC6122477; doi:10.1186/s12879-018-3356-6), 2018-09-03
Supplement: 12879_2018_3356_MOESM10_ESM.pdf [file 12879_2018_3356_MOESM10_ESM.pdf]

Figure S4

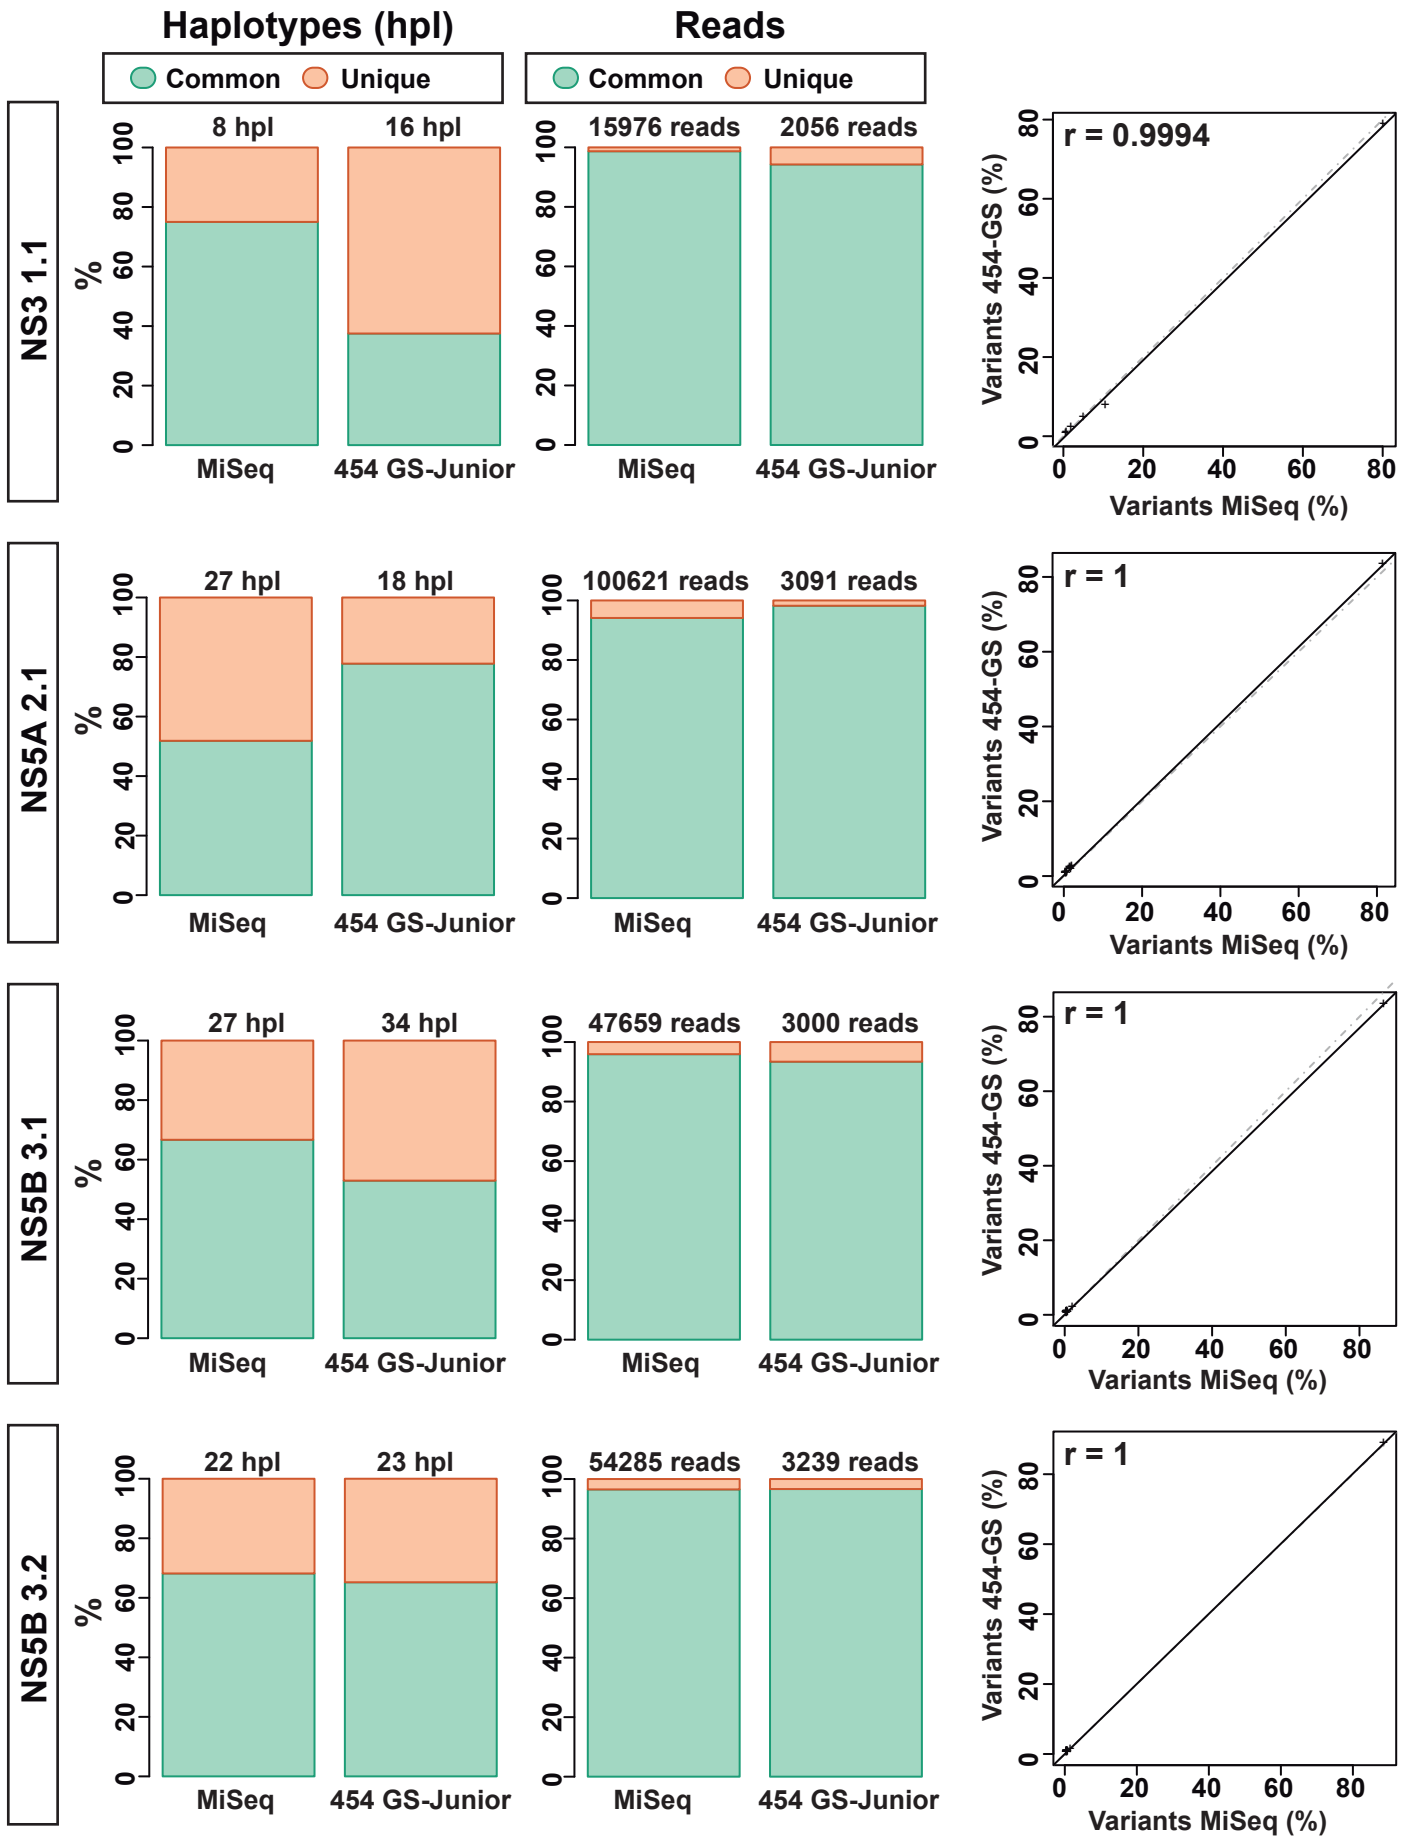

Figure S4 (continued)

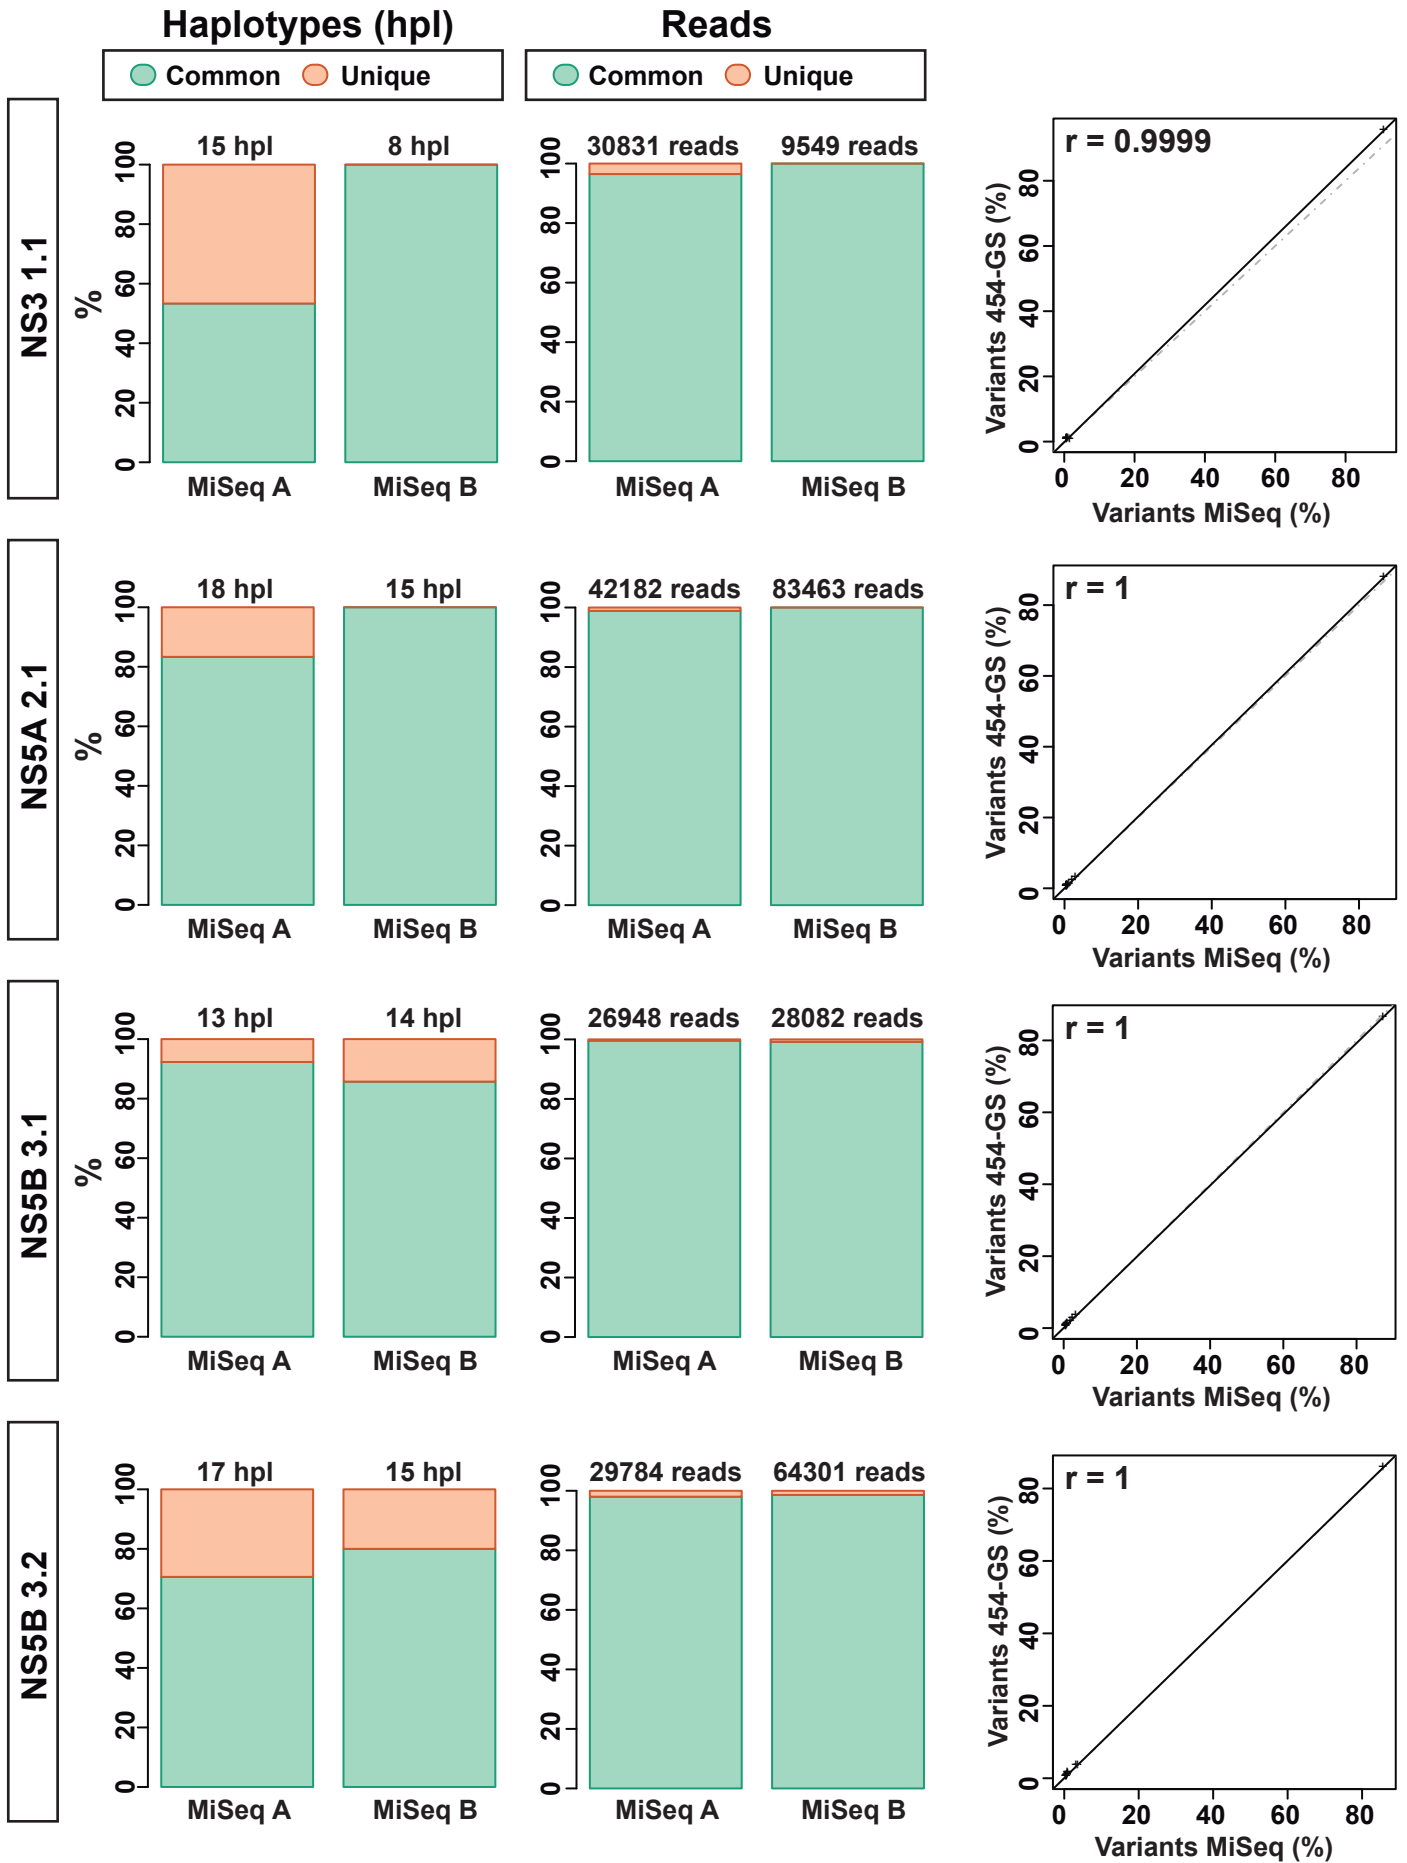

**Figure S4. Comparative analysis using inter- and intra- sequencing platforms.** Viral RNAs of two G1b HCV-infected patients (termed 8101 and JRR) at treatment (simeprevir/sofosbuvir/ribavirin) failure were used to amplify NS3- (PCR 1.1 in Figure 2), NS5A- (PCR 2.1 in Figure 2), and NS5B-coding regions (PCRs 3.1 and 3.2 in Figure 2), following the procedure described in Materials and Methods. Amplicons derived from 8101 viral RNA amplifications were sequenced in parallel using MiSeq and 454 GS-Junior platforms (inter-sequencing platforms comparison). Amplicons derived from JRR viral RNA amplifications were sequenced twice in two different runs using MiSeq platform (MiSeq A and B) (intra-sequencing platform comparison). Percentage of common and unique haplotypes and reads between both runs at each comparison are represented. Scatter plots comparing the percentage of variants obtained according to the two runs of each amplicon are shown on the right.
