# Supplementary material for: Pipeline for specific subtype amplification and drug resistance detection in hepatitis C virus
Source: PubMed Central journal article supplement (PMC6122477; doi:10.1186/s12879-018-3356-6), 2018-09-03
Supplement: 12879_2018_3356_MOESM13_ESM.pdf [file 12879_2018_3356_MOESM13_ESM.pdf]

Figure S7

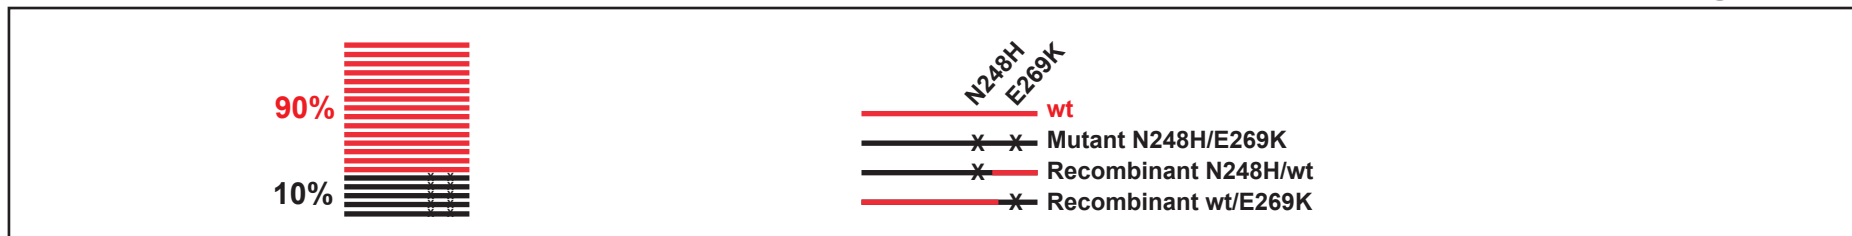

| 454-GS Junior |                      |        |        | MiSeq  |        |        |        |
|---------------|----------------------|--------|--------|--------|--------|--------|--------|
| 3 PCR         |                      | 2 PCR  |        | 2 PCR  |        |        |        |
| 1             |                      | 2      |        | 3      |        | 4      |        |
| Replicate 1   | wt                   | 89 %   | 93.47% | 98.11% | 79.64% | 92.88% | 87.26% |
|               | Mutant N248H/E269K   | 1.16 % | n.d.   | 1.41 % | 5.31 % | 1.78 % | 9.31 % |
|               | Recombinant N248H/wt | 3.35 % | 0.85 % | 0.48 % | 1.38 % | 0.42 % | 1.60 % |
|               | Recombinant wt/E269K | 2.48 % | n.d.   | n.d.   | 0.65 % | n.d.   | 1.40 % |
| Replicate 2   | wt                   | 87.2%  | 85.59% | 94.5%  | 90.09% | 90.46% | 88.96% |
|               | Mutant N248H/E269K   | 1.50 % | 3.55 % | 3.21 % | 2.69 % | 4.32 % | 5.29 % |
|               | Recombinant N248H/wt | 3.75 % | 7.42 % | 1.36 % | 0.76 % | 1.17 % | 0.39 % |
|               | Recombinant wt/E269K | 2.41 % | 4.08 % | 0.93 % | 0.57 % | 1.13 % | 0.38 % |
| Average       | wt                   | 88.1%  | 89.53% | 96.3%  | 84.86% | 91.67% | 88.11% |
|               | Mutant N248H/E269K   | 1.33 % | 1.77 % | 2.31 % | 4 %    | 3.05 % | 7.30 % |
|               | Recombinant N248H/wt | 3.55 % | 3.71 % | 0.68 % | 0.69 % | 0.58 % | 0.80 % |
|               | Recombinant wt/E269K | 2.44 % | 2.04 % | n.d.   | n.d.   | 0.56 % | 0.70 % |

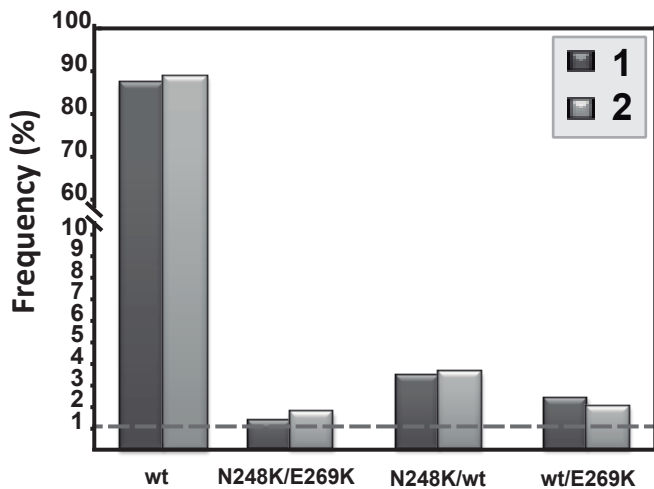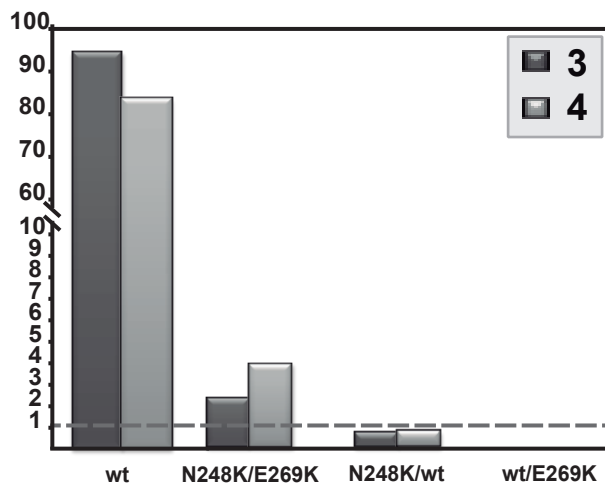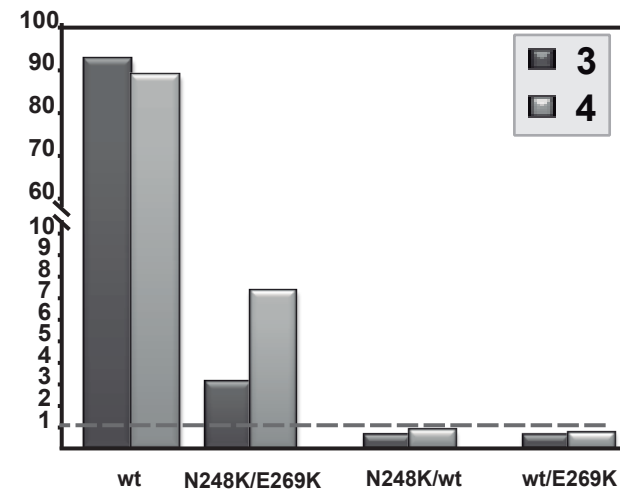

**Figure S7. Control of PCR-based recombination.** A full-length reference (wt) viral HCV DNA was mixed with HCV DNA with mutations A7010C and G7073A (corresponding to amino acid substitutions N248K and E269K in NS5A) at a 90:10 ratio (depicted on the left of the top box). The total number of DNA molecules was 100,000. The mixture was used as a template to determine the degree of recombination after the amplification and sequencing process, following four different protocols (termed 1 to 4), and two next-generation sequencing platforms (454 GS-Junior and Illumina MiSeq). Protocol conditions are described in Materials and Methods. Top box depicts the four types of expected molecules; wt clone, mutant N248K/E269K, and recombinant molecules N248K/wt and wt/E269K. Each experiment was performed in duplicate (replicates 1 and 2), and the average frequency (%) of both replicates is shown on the right of each molecule; n.d. means not detected. The percentage of reads that include the indicated substitutions is represented for each haplotype and protocol in the three panels at the bottom.
