# Supplementary material for: Pipeline for specific subtype amplification and drug resistance detection in hepatitis C virus
Source: PubMed Central journal article supplement (PMC6122477; doi:10.1186/s12879-018-3356-6), 2018-09-03
Supplement: 12879_2018_3356_MOESM14_ESM.pdf [file 12879_2018_3356_MOESM14_ESM.pdf]

Figure S8

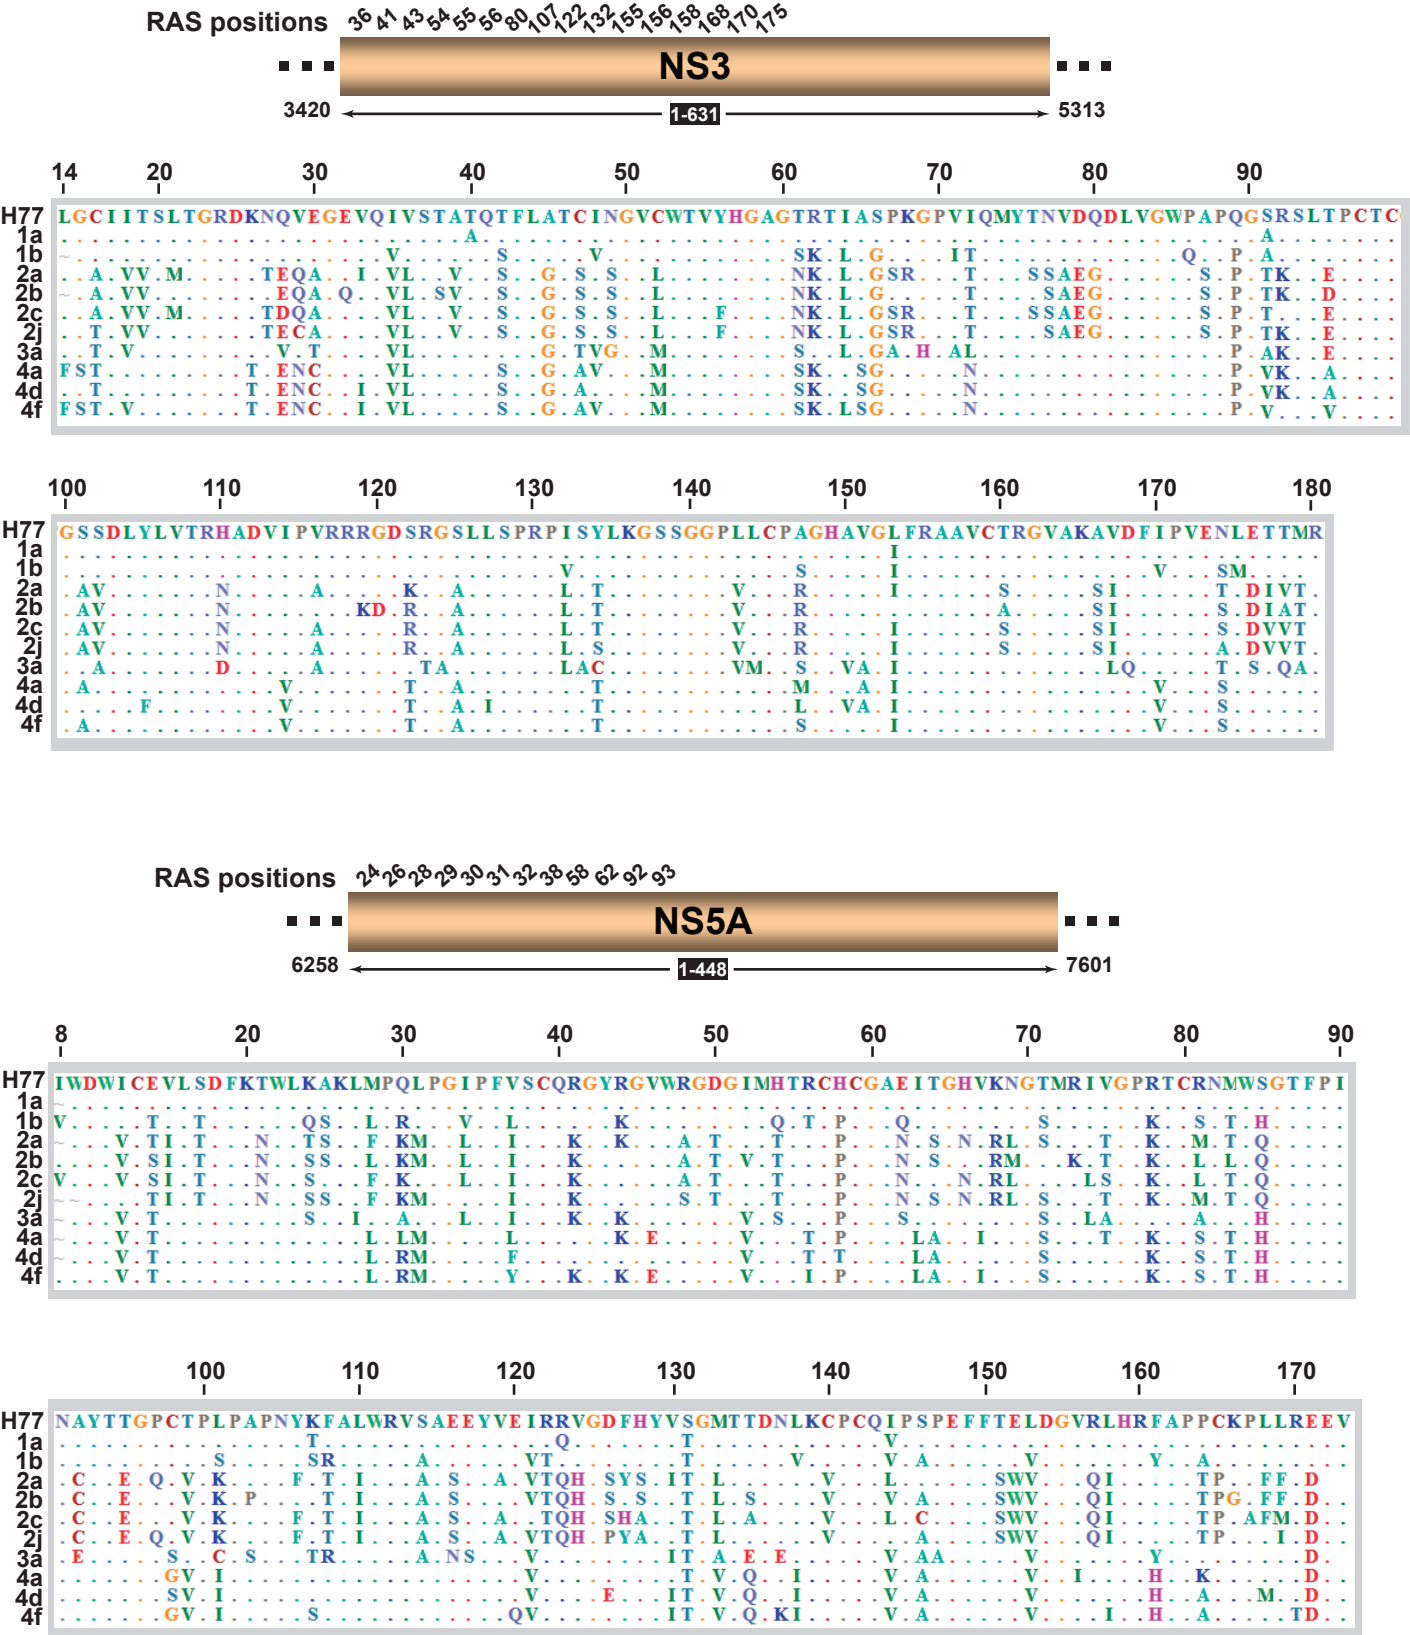

Figure S8 (continued)

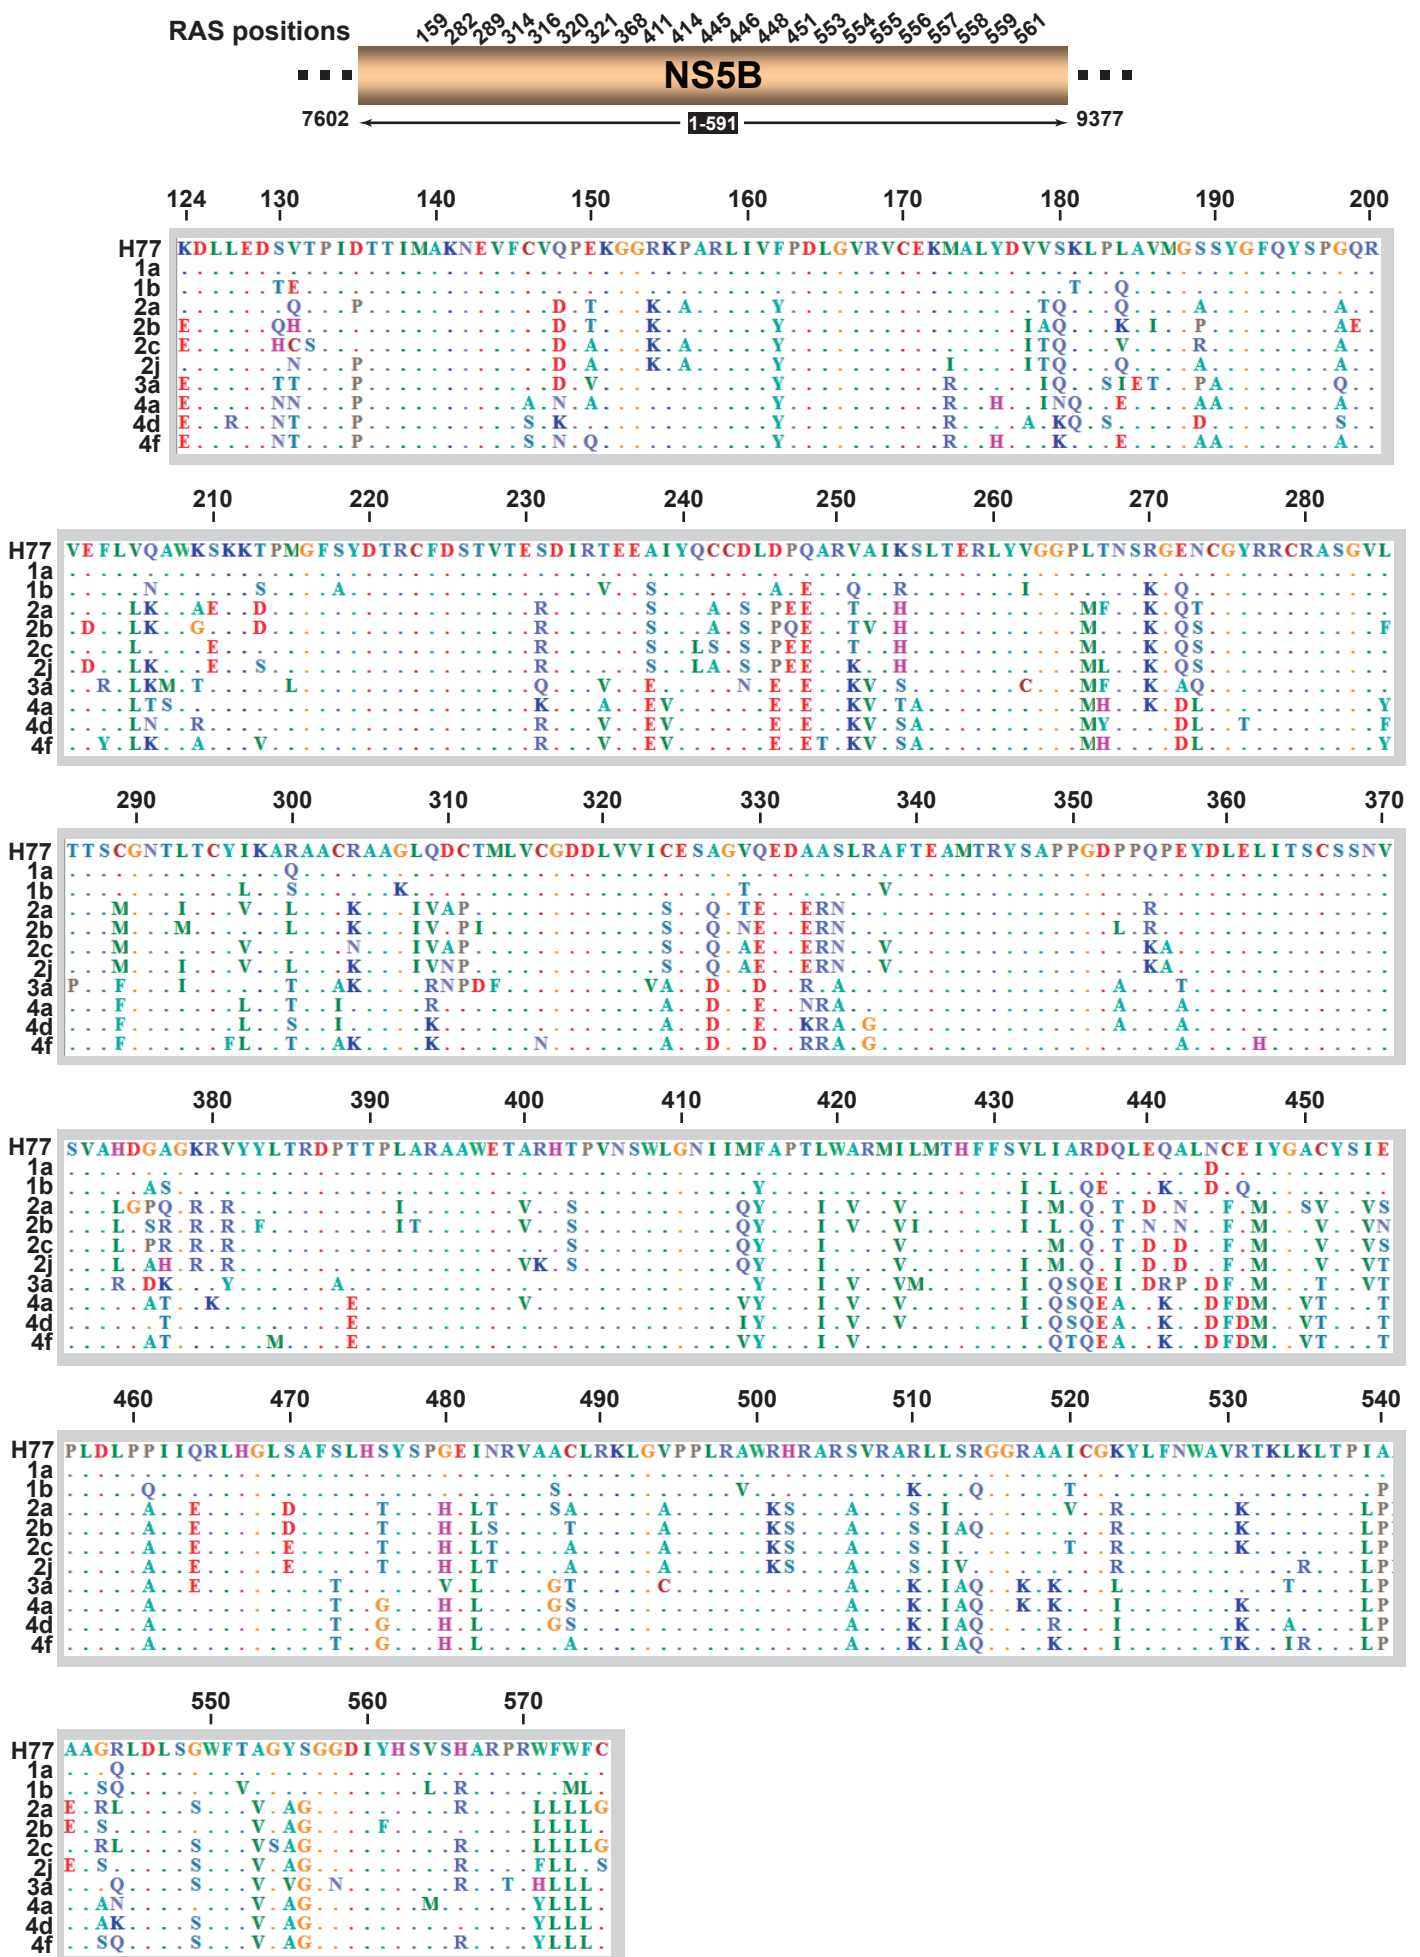

**Figure S8. Definition of the reference sequence for the ten subtypes under study.**

Nucleotide numbering at the beginning and at the end of NS3, NS5A and NS5B indicates the length of each coding region. Amino acid number of each coding region is indicated between the arrows. Positions at which resistance-associated substitutions (RAS) have been described are shown above the coding regions, and are included in our analyses. Alignments include a reference sequence for each subtype (1a, 1b, 2a, 2b, 2c, 2j, 3a, 4a, 4d, 4f); amino acid numbering above the boxes is indicated. Each reference sequence is defined as the most frequent amino acid at each position of the sequence ensemble for each subtype described in Table S1. Nucleotide and amino acid numbering are based on the HCV strain H77 (GenBank accession AF009606).
