# Supplementary material for: Pipeline for specific subtype amplification and drug resistance detection in hepatitis C virus
Source: Springer Nature journal article supplement (doi:10.1186/s12879-018-3356-6), 2018-09-03
Supplement: MOESM3 [file 16093638]

**Table S3.** Experimental samples and sequencing platforms used throughout this study.

| <b>Viral sample</b>                                                                  | <b>Sequencing platform</b> | <b>Number of samples</b> | <b>Number of amplicons</b> | <b>Aim</b>                                               |
|--------------------------------------------------------------------------------------|----------------------------|--------------------------|----------------------------|----------------------------------------------------------|
| HCV double mutant DNA                                                                | 454 GS-Junior              | 3                        | 3                          | Control of basal nucleotide sequencing error             |
|                                                                                      | MiSeq                      | 3                        | 3                          |                                                          |
| Standard HCV DNA +HCV double mutant DNA at proportion of 10%                         | 454 GS-Junior              | 8                        | 8                          | Control of PCR recombination                             |
|                                                                                      | MiSeq                      | 4                        | 4                          |                                                          |
| Viral RNA from G1a, G1b, G3a, and G4d HCV-infected patients at DAA treatment failure | MiSeq                      | 4                        | 16                         | Validation of subtype-specific deep-sequencing procedure |
| Viral RNA from G1a HCV-infected patient subjected to sequential DAA treatments       | MiSeq                      | 4                        | 16                         | Validation of subtype-specific deep-sequencing procedure |
| Viral RNA from G1b HCV-infected patient at DAA treatment failure                     | 454 GS-Junior              | 1                        | 4                          | Comparative analysis using inter-sequencing platforms    |
|                                                                                      | MiSeq                      | 1                        | 4                          |                                                          |
| Viral RNA from G1b HCV-infected patient at DAA treatment failure                     | MiSeq                      | 1                        | 4                          | Comparative analysis using intra-sequencing platforms    |
