# Supplementary material for: Pipeline for specific subtype amplification and drug resistance detection in hepatitis C virus
Source: Springer Nature journal article supplement (doi:10.1186/s12879-018-3356-6), 2018-09-03
Supplement: MOESM4 [file 16093638]

RT-PCR NS3 (1)

(5'- 3') (Forward)

| Subtypes | 3384 | 3385 | 3386 | 3387 | 3388 | 3389 | 3390 | 3391 | 3392 | 3393 | 3394 | 3395 | 3396 | 3397 | 3398 | 3399 | 3400 | 3401 | 3402 | 3403 | 3404 | 3405 | 3406 | 3407 | 3408 | 3409 | 3410 | 3411 | 3412 | 3413 | 3414 | 3415 |  |
|----------|------|------|------|------|------|------|------|------|------|------|------|------|------|------|------|------|------|------|------|------|------|------|------|------|------|------|------|------|------|------|------|------|--|
| 1a       |      |      |      |      |      |      |      | G    | A    | A    | T    | G    | G    | T    | C    | T    | C    | C    | A    | A    | G    | G    | G    | G    | T    | G    | G    | A    | G    | G    | T    |      |  |
| 1b       |      |      |      |      |      |      |      |      |      |      | T    | T    | G    | A    | R    | G    | G    | C    | A    | G    | G    | G    | G    | T    | G    | G    | C    | G    | R    | C    | T    |      |  |
| 2a       |      |      |      | G    | A    | T    | G    | G    | C    | T    | A    | C    | A    | C    | C    | T    | C    | Y    | A    | A    | G    | G    | G    | G    | T    | G    | G    | A    | A    | G    | C    | T    |  |
| 2b       |      |      |      |      |      |      |      | G    | C    | T    | A    | C    | A    | C    | C    | T    | C    | G    | A    | A    | G    | G    | G    | G    | T    | G    | G    | A    | A    | G    | C    | T    |  |
| 2c       | G    | C    | T    | G    | A    | T    | G    | G    | A    | T    | A    | Y    | A    | C    | C    | T    | C    | Y    | A    | A    | R    | G    | G    | T    | T    | G    | G    | A    | A    | G    | C    | T    |  |
| 2j       |      |      |      | G    | A    | C    | G    | A    | G    | T    | A    | C    | G    | T    | C    | T    | C    | C    | A    | R    | G    | G    | G    | R    | T    | G    | G    | A    | A    | G    | C    | T    |  |
| 3a       |      |      |      | G    | A    | T    | G    | A    | Y    | T    | A    | T    | C    | G    | T    | G    | C    | A    | T    | G    | G    | G    | T    | T    | G    | G    | A    | A    | G    | C    | T    |      |  |
| 4a       |      |      |      |      |      |      |      | C    | A    | G    | A    | A    | A    | C    | A    | T    | C    | M    | A    | A    | G    | G    | G    | G    | T    | G    | G    | A    | G    | A    | C    | T    |  |
| 4d       |      |      |      |      |      |      |      | C    | G    | C    | A    | C    | R    | C    | Y    | A    | T    | R    | A    | A    | G    | G    | G    | G    | T    | G    | G    | A    | A    | G    | C    | T    |  |
| 4f       |      |      |      |      |      |      |      |      |      |      | T    | G    | A    | G    | T    | G    | T    | C    | R    | G    | G    | G    | G    | T    | G    | G    | A    | A    | G    | C    | T    |      |  |

(5'- 3') (Reverse)

| Subtypes | 4007 | 4006 | 4005 | 4004 | 4003 | 4002 | 4001 | 4000 | 3999 | 3998 | 3997 | 3996 | 3995 | 3994 | 3993 | 3992 | 3991 | 3990 | 3989 | 3988 | 3987 | 3986 | 3985 | 3984 | 3983 | 3982 | 3981 | 3980 | 3979 |   |  |  |
|----------|------|------|------|------|------|------|------|------|------|------|------|------|------|------|------|------|------|------|------|------|------|------|------|------|------|------|------|------|------|---|--|--|
| 1a       |      |      |      | C    | T    | G    | G    | G    | G    | C    | A    | C    | T    | G    | C    | T    | G    | G    | T    | G    | G    | R    | G    | A    |      |      |      |      |      |   |  |  |
| 1b       | T    | G    | T    | C    | T    | G    | C    | G    | G    | C    | A    | C    | R    | G    | C    | C    | G    | R    | G    | G    |      |      |      |      |      |      |      |      |      |   |  |  |
| 2a       | G    | G    | T    | C    | T    | G    | G    | G    | G    | C    | A    | C    | A    | G    | C    | Y    | G    | G    | T    | G    | G    |      |      |      |      |      |      |      |      |   |  |  |
| 2b       |      |      |      | C    | T    | G    | G    | G    | G    | C    | A    | C    | A    | G    | C    | T    | G    | G    | T    | G    | G    | Y    | G    | T    |      |      |      |      |      |   |  |  |
| 2c       | G    | G    | T    | C    | T    | G    | G    | G    | G    | C    | A    | C    | A    | G    | C    | T    | G    | G    | A    | G    | G    |      |      |      |      |      |      |      |      |   |  |  |
| 2j       |      |      | T    | C    | T    | G    | G    | G    | G    | C    | A    | C    | A    | G    | C    | T    | G    | G    | R    | G    | G    | C    | G    | T    |      |      |      |      |      |   |  |  |
| 3a       |      |      |      | C    | T    | G    | T    | G    | G    | R    | A    | C    | R    | G    | C    | A    | G    | A    | G    | G    | A    | G    | A    | G    | T    | T    | G    | A    | A    | T |  |  |
| 4a       |      |      |      | C    | T    | G    | R    | G    | G    | C    | A    | C    | Y    | G    | C    | D    | G    | G    | G    | G    | G    | T    | G    | T    |      |      |      |      |      |   |  |  |
| 4d       |      |      |      | C    | T    | G    | G    | G    | G    | C    | A    | C    | G    | C    | A    | G    | A    | G    | G    | A    | G    | A    | G    | T    |      |      |      |      |      |   |  |  |
| 4f       |      |      |      | C    | T    | G    | G    | G    | G    | C    | A    | C    | A    | G    | C    | A    | G    | G    | A    | G    | G    | C    | G    | T    |      |      |      |      |      |   |  |  |

PCR NS3 (1.1)

(5'- 3') (Forward)

| Subtypes | 3490 | 3491 | 3492 | 3493 | 3494 | 3495 | 3496 | 3497 | 3498 | 3499 | 3500 | 3501 | 3502 | 3503 | 3504 | 3505 | 3506 | 3507 | 3508 | 3509 | 3510 | 3511 | 3512 |
|----------|------|------|------|------|------|------|------|------|------|------|------|------|------|------|------|------|------|------|------|------|------|------|------|
| 1a       | G    | G    | G    | A    | C    | A    | A    | A    | A    | A    | C    | C    | A    | R    | G    | T    | G    | G    | A    | G    | G    | G    | T    |
| 1b       | G    | G    | G    | A    | C    | A    | A    | T    | A    | A    | C    | C    | A    | G    | G    | T    | C    | G    | A    | G    | G    | G    | G    |
| 2a       | G    | Y    | G    | A    | C    | A    | R    | G    | A    | C    | A    | C    | A    | A    | G    | A    | G    | C    | A    | G    | C    | G    | G    |
| 2b       | G    | C    | G    | A    | C    | A    | A    | A    | A    | A    | T    | G    | A    | G    | C    | A    | G    | G    | C    | C    | G    | G    | G    |
| 2c       | G    | Y    | G    | A    | C    | A    | A    | G    | A    | C    | R    | G    | A    | M    | C    | A    | G    | C    | C    | T    | G    | G    | G    |
| 2j       | G    | C    | G    | A    | Y    | A    | A    | A    | A    | C    | R    | G    | A    | G    | T    | G    | T    | G    | C    | C    | G    | G    | A    |
| 3a       | G    | G    | G    | A    | Y    | A    | A    | G    | A    | A    | Y    | G    | T    | G    | G    | T    | G    | A    | C    | C    | G    | G    | T    |
| 4a       | G    | G    | G    | A    | C    | A    | C    | C    | A    | A    | T    | G    | A    | R    | A    | A    | T    | T    | G    | T    | G    | G    | T    |
| 4d       | G    | A    | G    | A    | C    | A    | C    | C    | A    | A    | C    | G    | A    | G    | A    | A    | C    | T    | G    | C    | G    | G    | T    |
| 4f       | G    | G    | G    | A    | Y    | A    | C    | T    | A    | A    | Y    | G    | A    | G    | A    | A    | Y    | T    | G    | T    | G    | G    | T    |

(5'- 3') (Reverse)

| Subtypes | 3982 | 3981 | 3980 | 3979 | 3978 | 3977 | 3976 | 3975 | 3974 | 3973 | 3972 | 3971 | 3970 | 3969 | 3968 | 3967 | 3966 | 3965 | 3964 | 3963 | 3962 | 3961 | 3960 | 3959 | 3958 |   |
|----------|------|------|------|------|------|------|------|------|------|------|------|------|------|------|------|------|------|------|------|------|------|------|------|------|------|---|
| 1a       | G    | A    | G    | T    | T    | G    | T    | C    | Y    | G    | T    | G    | A    | A    | C    | A    | C    | C    | G    | G    | G    | G    | A    | C    | C    |   |
| 1b       | G    | A    | R    | T    | T    | G    | T    | C    | Y    | G    | T    | G    | A    | A    | G    | A    | C    | C    | G    | G    | R    | G    | A    | C    | C    |   |
| 2a       | C    | T    | G    | T    | T    | G    | T    | C    | A    | C    | T    | R    | A    | A    | A    | G    | T    | C    | G    | G    | A    | G    | A    | C    | C    |   |
| 2b       | C    | T    | G    | T    | T    | G    | T    | C    | A    | G    | A    | G    | A    | A    | A    | C    | T    | G    | G    | G    | C    | G    | W    | C    | C    |   |
| 2c       | C    | T    | G    | T    | T    | G    | T    | C    | A    | G    | A    | R    | A    | A    | A    | G    | Y    | T    | T    | G    | G    | A    | G    | A    | C    | C |
| 2j       | C    | T    | G    | T    | T    | G    | T    | C    | A    | G    | T    | G    | A    | A    | R    | C    | T    | G    | G    | G    | G    | G    | A    | C    | C    |   |
| 3a       | G    | A    | A    | T    | T    | G    | T    | C    | A    | G    | A    | G    | A    | A    | R    | G    | A    | T    | G    | G    | A    | G    | A    | C    | C    |   |
| 4a       | G    | A    | R    | T    | T    | G    | T    | C    | A    | G    | T    | G    | A    | A    | C    | A    | C    | T    | G    | G    | T    | G    | A    | T    | C    |   |
| 4d       | G    | A    | A    | T    | T    | G    | T    | C    | A    | G    | A    | G    | A    | A    | T    | A    | C    | T    | G    | G    | R    | G    | A    | C    | C    |   |
| 4f       | G    | A    | R    | T    | T    | G    | T    | C    | A    | G    | A    | R    | A    | A    | G    | A    | C    | C    | G    | G    | G    | G    | A    | T    | C    |   |

PCR NS3 (1.2)

(5'- 3') (Forward)

| Subtypes | 3438 | 3439 | 3440 | 3441 | 3442 | 3443 | 3444 | 3445 | 3446 | 3447 | 3448 | 3449 | 3450 | 3451 | 3452 | 3453 | 3454 | 3455 | 3456 | 3457 | 3458 | 3459 | 3460 | 3461 |
|----------|------|------|------|------|------|------|------|------|------|------|------|------|------|------|------|------|------|------|------|------|------|------|------|------|
| 1a       | G    | C    | C    | C    | A    | G    | C    | A    | G    | A    | C    | R    | A    | G    | G    | G    | G    | C    | C    | T    |      |      |      |      |
| 1b       |      | C    | C    | C    | A    | A    | C    | A    | G    | A    | C    | G    | C    | G    | G    | G    | C    | C    | T    | A    | C    | T    | T    |      |
| 2a       | G    | C    | C    | C    | A    | G    | C    | A    | R    | A    | C    | A    | C    | G    | A    | G    | G    | Y    | C    | T    |      |      |      |      |
| 2b       | A    | C    | Y    | C    | A    | G    | C    | A    | G    | A    | C    | T    | C    | G    | T    | G    | G    | Y    | C    | T    | C    | C    | T    |      |
| 2c       | G    | C    | C    | C    | A    | G    | C    | A    | A    | A    | C    | C    | C    | G    | A    | G    | G    | K    | C    | T    |      |      |      |      |
| 2j       | G    | C    | T    | C    | A    | G    | C    | A    | G    | A    | C    | C    | C    | G    | T    | G    | G    | C    | C    | T    |      |      |      |      |
| 3a       | G    | C    | C    | C    | A    | G    | C    | A    | A    | A    | C    | Y    | A    | G    | R    | G    | G    | C    | C    | T    | T    |      |      |      |
| 4a       |      | C    | G    | C    | A    | G    | C    | A    | G    | A    | C    | C    | C    | G    | C    | G    | G    | C    | T    | T    |      |      |      |      |
| 4d       |      | C    | G    | C    | A    | G    | C    | A    | G    | A    | C    | C    | C    | G    | A    | G    | G    | A    | G    | A    | T    |      |      |      |
| 4f       | G    | C    | G    | C    | A    | G    | C    | A    | A    | A    | C    | T    | C    | G    | A    | G    | G    | C    | T    | T    |      |      |      |      |

(5'- 3') (Reverse)

| Subtypes | 3988 | 3987 | 3986 | 3985 | 3984 | 3983 | 3982 | 3981 | 3980 | 3979 | 3978 | 3977 | 3976 | 3975 | 3974 | 3973 | 3972 | 3971 | 3970 | 3969 | 3968 | 3967 | 3966 | 3965 | 3964 | 3963 | 3962 | 3961 | 3960 | 3959 | 3958 | 3957 |  |
|----------|------|------|------|------|------|------|------|------|------|------|------|------|------|------|------|------|------|------|------|------|------|------|------|------|------|------|------|------|------|------|------|------|--|
| 1a       |      |      |      |      |      |      | G    | A    | G    | T    | T    | G    | T    | C    | Y    | G    | T    | G    | A    | A    | C    | A    | C    | C    | G    | G    | G    | G    | A    | A    | C    |      |  |
| 1b       |      |      |      |      |      |      | G    | A    | R    | T    | T    | G    | T    | C    | Y    | G    | T    | G    | A    | A    | A    | C    | C    | C    | G    | G    | R    | G    | A    | A    | C    | C    |  |
| 2a       |      |      |      |      |      | G    | C    | T    | G    | T    | T    | G    | T    | C    | A    | C    | T    | R    | A    | A    | A    | G    | G    | T    | G    | G    | G    | R    | G    | A    | A    | C    |  |
| 2b       |      |      |      | G    | T    |      | C    | T    | G    | T    | T    | G    | T    | C    | A    | G    | A    | A    | A    | A    | A    | C    | T    | T    | G    | G    | G    | C    | G    | A    | A    | C    |  |
| 2c       |      |      |      |      |      |      | C    | T    | G    | T    | T    | G    | T    | C    | A    | G    | T    | R    | A    | A    | A    | R    | Y    | T    | T    | G    | G    | A    | A    | A    | C    | C    |  |
| 2j       |      |      |      |      |      |      | G    | C    | T    | G    | T    | T    | G    | T    | C    | A    | G    | T    | G    | A    | A    | R    | C    | T    | T    | G    | G    | A    | G    | A    | A    | C    |  |
| 3a       | G    | G    | A    | G    | T    | T    | G    | A    | A    | T    | T    | G    | T    | C    | A    | G    | A    | G    | A    | A    | R    | G    | A    | A    | T    | G    | G    | A    | G    | A    | A    | C    |  |
| 4a       |      |      |      | G    | T    | T    | G    | A    | R    | T    | T    | G    | T    | C    | A    | G    | T    | G    | A    | A    | A    | C    | A    | C    | T    | G    | G    | A    | G    | A    | A    | C    |  |
| 4d       |      |      |      | G    | T    | G    | G    | A    | A    | T    | T    | G    | T    | C    | A    | G    | A    | G    | A    | A    | A    | T    | A    | C    | T    | G    | G    | A    | G    | A    | A    | C    |  |
| 4f       |      |      |      |      |      |      | G    | A    | R    | T    | T    | G    | T    | C    | A    | G    | A    | A    | A    | A    | G    | A    | C    | C    | G    | G    | G    | A    | G    | A    | A    | C    |  |

Figure S1. Subtype-specific oligonucleotides designed to sequence the NS3-coding region. Residue numbering is according to the reference strain AF009606. Positions in red are conserved among the different subtypes, and positions with different colors are discriminatory of a specific subtype (color codes given in the left column at each panel). Discriminatory positions for genotype are highlighted in pink.
