# Supplementary material for: Pipeline for specific subtype amplification and drug resistance detection in hepatitis C virus
Source: Springer Nature journal article supplement (doi:10.1186/s12879-018-3356-6), 2018-09-03
Supplement: MOESM7 [file 16093638]

**Table S4.** Subtype-specific oligonucleotides designed to sequence the NS3-coding region.

| Subtype | PCR Name                                 | Sense         | Primer Name                                               | Sequence (5'-3') <sup>a</sup>                             | Position <sup>b</sup> | T <sub>m</sub> (°C) |
|---------|------------------------------------------|---------------|-----------------------------------------------------------|-----------------------------------------------------------|-----------------------|---------------------|
| 1a      | <b>External oligonucleotides (5'-3')</b> |               |                                                           |                                                           |                       |                     |
|         | RT-PCR 1                                 | Fw            | NS3u1a3391                                                | GAATGGTCTCCAAGGGGTGGAGGT                                  | 3391-3414             | 60.8                |
|         |                                          | Rv            | NS3d1a4004                                                | CTGGGGCACTGCTGGTGGRGA                                     | 4004-3984             | 60.2-62.2           |
|         | <b>Internal oligonucleotides (5'-3')</b> |               |                                                           |                                                           |                       |                     |
|         | PCR 1.1                                  | Fw            | 13u1a3490                                                 | <u>GTTGTAAAACGACGGCCAGTGGGACAAAA</u><br>CCARGTGGAGGGT     | 3490-3512             | 57.1-58.8           |
|         | PCR 1.1                                  | Rv            | 13d1a3982                                                 | <u>CACAGGAAACAGCTATGACCGAGTTGTCYGT</u><br>GAACACCGGGGACC  | 3982-3958             | 62.6-64.2           |
|         | PCR 1.2                                  | Fw            | NS3M13u1a3438                                             | <u>GTTGTAAAACGACGGCCAGTGGCCAGCAGA</u><br>CRAGGGGCCT       | 3438-3457             | 60-62               |
| PCR 1.2 | Rv                                       | NS3M13d1a3982 | <u>CACAGGAAACAGCTATGACCGAGTTGTCYGT</u><br>GAACACCGGGGA    | 3982-3960                                                 | 58.8-60.6             |                     |
| 1b      | <b>External oligonucleotides (5'-3')</b> |               |                                                           |                                                           |                       |                     |
|         | RT-PCR 1                                 | Fw            | NS3u1b3394                                                | TTGARGGGCAGGGGTGGCGRCT                                    | 3394-3415             | 60.4-64.2           |
|         |                                          | Rv            | NS3d1b4007                                                | TGTCTGCGGTACRGCCGRRGG                                     | 4007-3987             | 60.2-64.1           |
|         | <b>Internal oligonucleotides (5'-3')</b> |               |                                                           |                                                           |                       |                     |
|         | PCR 1.1                                  | Fw            | 13u1b3490                                                 | <u>GTTGTAAAACGACGGCCAGTGGGACAATAA</u><br>CCAGTTCGAGGGG    | 3490-3512             | 60.6                |
|         | PCR 1.1                                  | Rv            | 13d1b3982                                                 | <u>CACAGGAAACAGCTATGACCGARTTGTCTYGT</u><br>GAAGACCGRRGACC | 3982-3958             | 59.3-64.2           |
|         | PCR 1.2                                  | Fw            | NS3M13u1b3439                                             | <u>GTTGTAAAACGACGGCCAGTCCCAACAGAC</u><br>CGGGGCCTACTT     | 3439-3461             | 62.4                |
| PCR 1.2 | Rv                                       | NS3M13d1b3982 | <u>CACAGGAAACAGCTATGACCGARTTGTCTYGT</u><br>GAAGACCGRRGACC | 3982-3958                                                 | 59.3-64.2             |                     |
| 2a      | <b>External oligonucleotides (5'-3')</b> |               |                                                           |                                                           |                       |                     |
|         | RT-PCR 1                                 | Fw            | NS3u2a3387                                                | GATGGCTACACCTCYAAGGGGTGGA                                 | 3387-3411             | 61-62.6             |
|         |                                          | Rv            | NS3d2a4007                                                | GGTCTGGGGCACAGCYGGTGG                                     | 4007-3987             | 62.2-64.1           |
|         | <b>Internal oligonucleotides (5'-3')</b> |               |                                                           |                                                           |                       |                     |
|         | PCR 1.1                                  | Fw            | 13u2a3490                                                 | <u>GTTGTAAAACGACGGCCAGTGYGACARGAC</u><br>AGAACAGGCCGGG    | 3490-3512             | 60.6-64.2           |
|         | PCR 1.1                                  | Rv            | 13d2a3982                                                 | <u>CACAGGAAACAGCTATGACCCTGTTGTCACT</u><br>RAAGTGGGAGACC   | 3982-3958             | 59.3-61             |
|         | PCR 1.2                                  | Fw            | NS3M13u2a3438                                             | <u>GTTGTAAAACGACGGCCAGTGGCCAGCAGA</u><br>CACGAGGYCT       | 3438-3457             | 55.9-60             |
| PCR 1.2 | Rv                                       | NS3M13d2a3983 | <u>CACAGGAAACAGCTATGACCCTGTTGTCAC</u><br>TRAAGTGGRRGA     | 3983-3960                                                 | 57.4-60.8             |                     |
| 2b      | <b>External oligonucleotides (5'-3')</b> |               |                                                           |                                                           |                       |                     |
|         | RT-PCR 1                                 | Fw            | NS3u2b3391                                                | GCTACACCTCGAAGGGGTGGAAGCT                                 | 3391-3415             | 62.6                |
|         |                                          | Rv            | NS3d2b4004                                                | CTGGGGCACAGCTGGTGGYGT                                     | 4004-3984             | 60.2-62.2           |
|         | <b>Internal oligonucleotides (5'-3')</b> |               |                                                           |                                                           |                       |                     |
|         | PCR 1.1                                  | Fw            | 13u2b3490                                                 | <u>GTTGTAAAACGACGGCCAGTGGCACAAAAA</u><br>TGAGCAGGCCGGG    | 3490-3512             | 60.6                |
|         | PCR 1.1                                  | Rv            | 13d2b3982                                                 | <u>CACAGGAAACAGCTATGACCCTGTTGTCAGA</u><br>GAAACTGGGCGWCC  | 3982-3958             | 61                  |
|         | PCR 1.2                                  | Fw            | NS3M13u2b3438                                             | <u>GTTGTAAAACGACGGCCAGTACYCAGCAGA</u><br>CTCGTGGYCTCCT    | 3438-3460             | 58.8-62.4           |
| PCR 1.2 | Rv                                       | NS3M13d2b3985 | <u>CACAGGAAACAGCTATGACCCTGTTGTC</u><br>AGAGAACTGGGCG      | 3985-3961                                                 | 59.3-61               |                     |
| 2c      | <b>External oligonucleotides (5'-3')</b> |               |                                                           |                                                           |                       |                     |
|         | RT-PCR 1                                 | Fw            | NS3u2c3384                                                | GCTGATGGATAYACCTCYAARGGTTGGA                              | 3384-3411             | 58.5-62.9           |
|         |                                          | Rv            | NS3d2c4007                                                | GGTCTGGGGCACAGCTGGAGG                                     | 4007-3987             | 62.2                |
|         | <b>Internal oligonucleotides (5'-3')</b> |               |                                                           |                                                           |                       |                     |
|         | PCR 1.1                                  | Fw            | 13u2c3490                                                 | <u>GTTGTAAAACGACGGCCAGTGYGACAAGAC</u><br>RGAMCAGGCTGGG    | 3490-3512             | 58.8-64.2           |
|         | PCR 1.1                                  | Rv            | 13d2c3982                                                 | <u>CACAGGAAACAGCTATGACCCTGTTGTCAGT</u><br>RAAGYTTGGAGACC  | 3982-3958             | 56-59.3             |
|         | PCR 1.2                                  | Fw            | NS3M13u2c3438                                             | <u>GTTGTAAAACGACGGCCAGTGGCCAGCAAA</u><br>CCCAGGKCT        | 3438-3457             | 57.9-60             |

|         |                                          |               |                                                              |                                                            |           |           |  |
|---------|------------------------------------------|---------------|--------------------------------------------------------------|------------------------------------------------------------|-----------|-----------|--|
|         | PCR 1.2                                  | Rv            | NS3M13d2c3982                                                | <u>CACAGGAAACAGCTATGACCCTGTTGTCAGT</u><br>RAARYTTGGAGACCT  | 3982-3957 | 54.8-59.5 |  |
| 2j      | <b>External oligonucleotides (5'-3')</b> |               |                                                              |                                                            |           |           |  |
|         | RT-PCR 1                                 | Fw            | NS3u2j3387                                                   | GACGAGTACGTCTCCARGGGRTGGA                                  | 3387-3411 | 61-64.2   |  |
|         |                                          | Rv            | NS3d2j4005                                                   | TCTGGGGCACAGCTGGRGGCGT                                     | 4005-3984 | 62.3-64.2 |  |
|         | <b>Internal oligonucleotides (5'-3')</b> |               |                                                              |                                                            |           |           |  |
|         | PCR 1.1                                  | Fw            | 13u2j3490                                                    | <u>GTTGTAAAACGACGGCCAGT</u> GCGAYAAAAC<br>RGAGTGTGCCGA     | 3490-3512 | 57.1-60.6 |  |
|         | PCR 1.1                                  | Rv            | 13d2j3982                                                    | <u>CACAGGAAACAGCTATGACCCTGTTGTCAGT</u><br>GAARCTGGGGGACC   | 3982-3958 | 61-62.6   |  |
|         | PCR 1.2                                  | Fw            | NS3M13u2j3438                                                | <u>GTTGTAAAACGACGGCCAGT</u> GCTCAGCAGA<br>CCCGTGGCCT       | 3438-3457 | 60        |  |
| PCR 1.2 | Rv                                       | NS3M13d2j3983 | <u>CACAGGAAACAGCTATGACCCTGTTGTCAG</u><br>TGAARCTGGGGGA       | 3983-3960                                                  | 59.1-60.8 |           |  |
| 3a      | <b>External oligonucleotides (5'-3')</b> |               |                                                              |                                                            |           |           |  |
|         | RT-PCR 1                                 | Fw            | NS3u3a3387                                                   | GATGAYTATCGGGAGATGGGTTGGC                                  | 3387-3411 | 59.3-61   |  |
|         |                                          | Rv            | NS3d3a4004                                                   | CTGTGGRACRGCAGGAGGAGTTGAAT                                 | 4004-3979 | 59.5-62.7 |  |
|         | <b>Internal oligonucleotides (5'-3')</b> |               |                                                              |                                                            |           |           |  |
|         | PCR 1.1                                  | Fw            | 13u3a3490                                                    | <u>GTTGTAAAACGACGGCCAGT</u> GGGAYAAGAA<br>YGTGGTGACCGGT    | 3490-3512 | 57.1-60.6 |  |
|         | PCR 1.1                                  | Rv            | 13d3a3982                                                    | <u>CACAGGAAACAGCTATGACCGAATTGTCAG</u><br>AGAARGATGGAGACC   | 3982-3958 | 56-57.7   |  |
|         | PCR 1.2                                  | Fw            | NS3M13u3a3438                                                | <u>GTTGTAAAACGACGGCCAGT</u> GCCAGCAAA<br>CYAGRGGCCTT       | 3438-3458 | 56.3-60.2 |  |
| PCR 1.2 | Rv                                       | NS3M13d3a3988 | <u>CACAGGAAACAGCTATGACCGGAGTTGAATT</u><br>GTCAGAGAARGATGGAGA | 3988-3960                                                  | 58.7-60.1 |           |  |
| 4a      | <b>External oligonucleotides (5'-3')</b> |               |                                                              |                                                            |           |           |  |
|         | RT-PCR 1                                 | Fw            | NS3u4a3391                                                   | CAGAAACATCMAAGGGGTGGAGACT                                  | 3391-3415 | 57.7-59.3 |  |
|         |                                          | Rv            | NS3d4a4004                                                   | CTGRGGCACYGCDGGGGGTGT                                      | 4004-3984 | 60.2-66.1 |  |
|         | <b>Internal oligonucleotides (5'-3')</b> |               |                                                              |                                                            |           |           |  |
|         | PCR 1.1                                  | Fw            | 13u4a3490                                                    | <u>GTTGTAAAACGACGGCCAGT</u> GGGACACCAA<br>TGARAATTGTGGT    | 3490-3512 | 53.5-55.3 |  |
|         | PCR 1.1                                  | Rv            | 13d4a3982                                                    | <u>CACAGGAAACAGCTATGACCGARTTGTGTCAGT</u><br>GAACACTGGTGATC | 3982-3958 | 56-57.7   |  |
|         | PCR 1.2                                  | Fw            | NS3M13u4a3439                                                | <u>GTTGTAAAACGACGGCCAGT</u> CGCAGCAGAC<br>CCGCGGCTT        | 3439-3457 | 59.7      |  |
| PCR 1.2 | Rv                                       | NS3M13d4a3985 | <u>CACAGGAAACAGCTATGACCGTTGARTTGTG</u><br>AGTGAACACTGGTGA    | 3985-3960                                                  | 56.4-58   |           |  |
| 4d      | <b>External oligonucleotides (5'-3')</b> |               |                                                              |                                                            |           |           |  |
|         | RT-PCR 1                                 | Fw            | NS3u4d3391                                                   | CGCACRCYATRAAGGGGTGGA                                      | 3391-3411 | 54.4-60.2 |  |
|         |                                          | Rv            | NS3d4d4004                                                   | CTGGGGCACGGCAGGAGGAGT                                      | 4004-3984 | 62.2      |  |
|         | <b>Internal oligonucleotides (5'-3')</b> |               |                                                              |                                                            |           |           |  |
|         | PCR 1.1                                  | Fw            | 13u4d3490                                                    | <u>GTTGTAAAACGACGGCCAGT</u> GAGACACCAA<br>CGAGAACTGCGGT    | 3490-3512 | 58.8      |  |
|         | PCR 1.1                                  | Rv            | 13d4d3982                                                    | <u>CACAGGAAACAGCTATGACCGAATTGTCAG</u><br>AGAATACTGGRGACC   | 3982-3958 | 56-57.7   |  |
|         | PCR 1.2                                  | Fw            | NS3M13u4d3439                                                | <u>GTTGTAAAACGACGGCCAGT</u> CGCAGCAGAC<br>CCGAGGGAT        | 3439-3457 | 57.6      |  |
| PCR 1.2 | Rv                                       | NS3M13d4d3985 | <u>CACAGGAAACAGCTATGACCGTGAATTGTG</u><br>AGAGAATACTGGAGA     | 3985-3960                                                  | 56.4      |           |  |
| 4f      | <b>External oligonucleotides (5'-3')</b> |               |                                                              |                                                            |           |           |  |
|         | RT-PCR 1                                 | Fw            | NS3u4f3392                                                   | TGAGGTGTCRGGGGGTGGA                                        | 3392-3411 | 57.9-60   |  |
|         |                                          | Rv            | NS3d4f4004                                                   | CTGGGGCACAGCAGGAGGCGT                                      | 4004-3984 | 62.2      |  |
|         | <b>Internal oligonucleotides (5'-3')</b> |               |                                                              |                                                            |           |           |  |
|         | PCR 1.1                                  | Fw            | 13u4f3490                                                    | <u>GTTGTAAAACGACGGCCAGT</u> GGGAYACTAA<br>YGAGAAYTGTGGT    | 3490-3512 | 51.7-57.1 |  |
|         | PCR 1.1                                  | Rv            | 13d4f3982                                                    | <u>CACAGGAAACAGCTATGACCGARTTGTGTCAG</u><br>ARAAGACCGGGGATC | 3982-3958 | 57.7-61   |  |
|         | PCR 1.2                                  | Fw            | NS3M13u4f3438                                                | <u>GTTGTAAAACGACGGCCAGT</u> GCGCAGCAAA<br>CTCGAGGCTT       | 3438-3457 | 55.9      |  |
| PCR 1.2 | Rv                                       | NS3M13d4f3982 | <u>CACAGGAAACAGCTATGACCGARTTGTGTCAG</u><br>AAAAGACCGGGGA     | 3982-3960                                                  | 55.3-57.1 |           |  |

<sup>a</sup>The underlined nucleotides indicate universal M13 oligonucleotide

<sup>b</sup>Residue numbering according to the reference strain AF009606
