# Supplementary material for: Pipeline for specific subtype amplification and drug resistance detection in hepatitis C virus
Source: Springer Nature journal article supplement (doi:10.1186/s12879-018-3356-6), 2018-09-03
Supplement: MOESM11 [file 16093638]

Figure S5

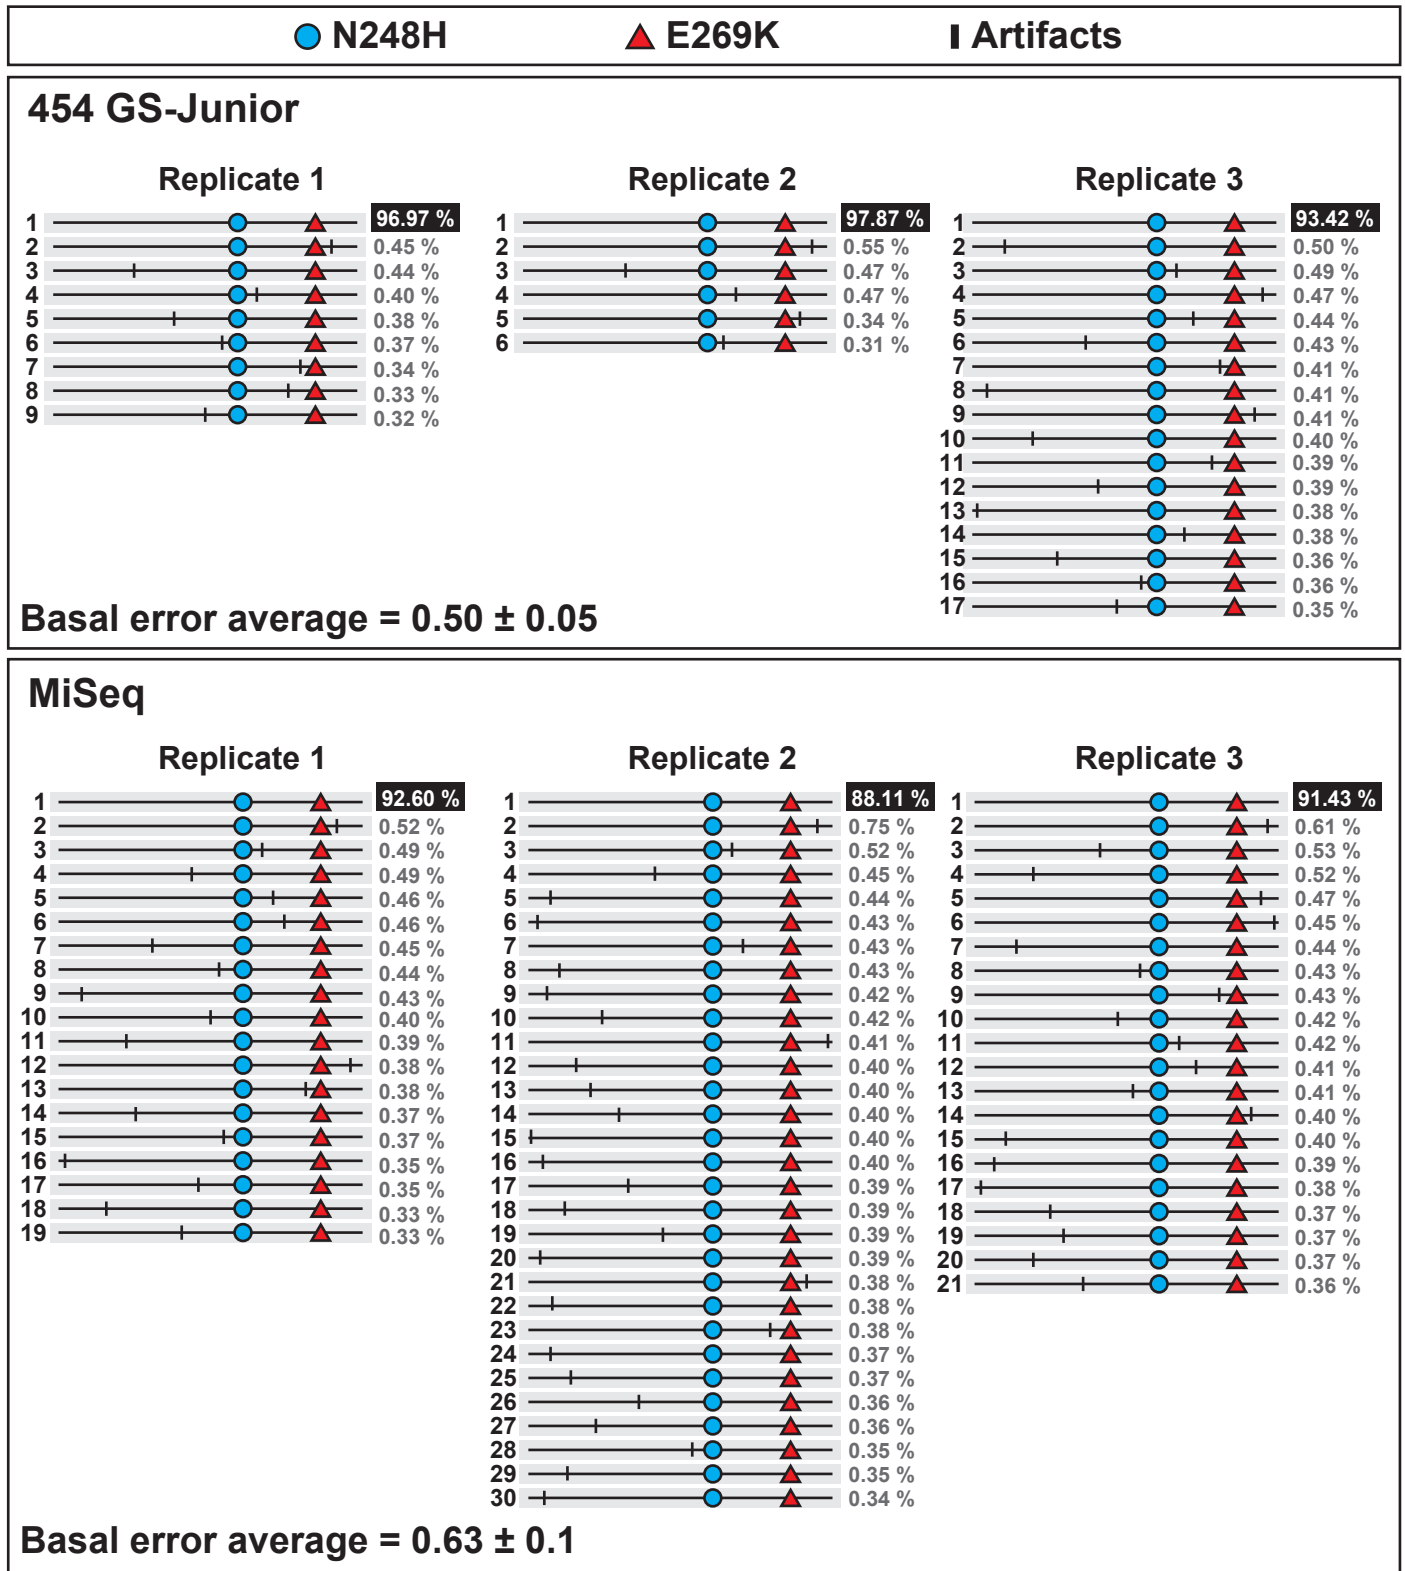

**Figure S5. Control of basal error.** A full-length HCV DNA encoding NS5A with amino acid substitutions N248K, E269K and A346V was used as a template to determine the basal error of the amplification and sequencing process using 454 GS-Junior and Illumina MiSeq platforms. Due to restriction size of amplicon length, only N248K and E269K were detected. Experiments were performed in triplicate. Haplotypes obtained after amplification and sequencing are numbered on the left of each replicate, and percentages of reads that include the indicated substitutions are shown on the right. Artifacts means mutations other than those encoding N248K and E269K. Basal error average is the mean ± standard deviation of the haplotypes number 2, which are those including artifacts found at the highest frequency.
